# Supplementary material for: Pseudo-proxy evaluation of Climate Field Reconstruction methods of North Atlantic climate based on an annually resolved marine proxy network
Source: Copernicus journal article supplement (doi:10.5194/cp-2017-61), 2017-04-12
Supplement: Supplementary file [file cp-2017-61-RC1-supplement.pdf]

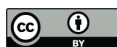

# Pseudo-proxy evaluation of Climate Field Reconstruction methods of North Atlantic climate based on an annually resolved marine proxy network

Maria Pyrina<sup>1</sup>, Sebastian Wagner<sup>1</sup>, Eduardo Zorita<sup>1</sup>

<sup>1</sup>Helmholtz Zentrum Geesthacht, Institute of Coastal Research, Geesthacht, 21502, Germany

Correspondence to: Maria Pyrina (maria.pyrina@hzg.de)

**Abstract.** Two statistical methods are tested to reconstruct the inter-annual variations of past sea surface temperatures (SSTs) of the North Atlantic (NA) Ocean over the past millennium, based on annually resolved and absolutely dated marine proxy records of the bivalve mollusk *Arctica islandica*. The methods are tested in a pseudo-proxy experiment (PPE) set-up using state-of-the-art climate models (CMIP5 Earth System Models) and reanalysis data from the COBE2 SST data set. The methods were applied in the virtual reality provided by global climate simulations and reanalysis data to reconstruct the past NA SSTs, using pseudo-proxy records that mimic the statistical characteristics and network of *Arctica islandica*. The multivariate linear regression methods evaluated here are Principal Component Regression and Canonical Correlation Analysis. Differences in the skill of the Climate Field Reconstruction (CFR) are assessed according to different calibration periods and different proxy locations within the NA basin. The choice of the climate model used as surrogate reality in the PPE has a more profound effect on the CFR skill than the calibration period and the statistical reconstruction method. The differences between the two methods are clearer for the MPI-ESM model, due to its higher spatial resolution in the NA basin. The pseudo-proxy results of the CCSM4 model are closer to the pseudo-proxy results based on the reanalysis data set COBE2. The addition of noise in the pseudo-proxies is important for the evaluation of the methods, as more spatial differences in the reconstruction skill are revealed. More profound differences between methods are obtained when the number of proxy records is smaller than five, making the Principal Component Regression a more appropriate method in this case. Despite the differences, the results show that the marine network of *Arctica islandica* can be used to skilfully reconstruct the spatial patterns of SSTs at the eastern NA basin.

## 1 Introduction

Several studies have targeted to reconstruct hemispheric or global average temperature from networks of proxy records (Mann and Jones, 2003; Marcott et al., 2013; Moberg et al., 2005), as well as spatial patterns of past temperature changes at global (Rutherford et al., 2005; Wahl and Ammann, 2007) and regional scale (Ahmed et al., 2013; Luterbacher et al., 2004; Xoplaki et al., 2005) during the last millennium. Most of these studies have primarily used terrestrial proxy records including very few marine proxies that could contain information about the vast ocean areas, e.g. over the North Pacific and the North Atlantic Ocean. In the context of marine proxy networks, reconstructions of global SSTs for the past 2000 years derived from individual marine reconstructions were recently published as a global synthesis of SST for the Common Era (CE), (McGregor et al., 2015). Due to the diversity of marine proxies used, McGregor et al., 2015 averaged each SST reconstruction into 200-yr bins providing a synthesis of proxy data representative for global variations, yet losing temporal information on decadal to multi-decadal time scales. Other studies have targeted reconstructions of spatial patterns of SST changes using marine proxies, but mostly regarding regions in the tropics and subtropics (Dowsett and Robinson, 2009; Evans et al., 2000; Tierney et al., 2015; Wilson et al., 2006). Regarding the NA Ocean, Gray et al., 2004 reconstructed the Atlantic Multi-decadal Oscillation (AMO) since 1567 AD using

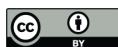

tree ring records, while [Shal et al., 2002](#) used sediment cores to locally reconstruct upper ocean temperature during the Holocene (10-0 ka B.P.).

In the present study, we target to test the potential of using a high-resolution marine proxy collected in the NA Ocean to reconstruct spatially resolved SST fields for the last millennium, and further test whether CFR methods are appropriate for that specific marine proxy network. The real world proxy that motivates our PPEs is *Arctica islandica*. It is an absolutely dated (Scourse et al., 2006), annually lived (Butler et al., 2009), and long lived bivalve mollusk (Butler et al., 2013; Jr et al., 2008) that can serve as a proxy archive for the Atlantic marine climate (Reynolds et al., 2017; Wanamaker Jr et al., 2012). It can be found in various regions in the NA including locations north of 60° N (Dahlgren et al., 2000) and, amongst others, it can be used to reconstruct SSTs (Eagle et al., 2013) and major NA climate modes like the AMO (Mette et al., 2015). *Arctica*'s proxy collection sites have been found to contain a NA SST basin signal (Pyrina et al., 2017) which renders this proxy archive suitable for CFRs.

Numerous reconstructions of large scale mean climate have employed CFR approaches simulating proxy records into reconstructions of the underlying spatial patterns of past climate change (Riedwyl et al., 2009; Riedwyl et al., 2008; Touchan et al., 2005; Zhang et al., 2016). These methods use the spatial covariance between the proxy series and the instrumental series during overlapping calibration periods. However, observational environmental records span at the most the past 150 years aggravating that the covariance structure estimated at inter-annual timescales is also valid at decadal and multi-decadal timescales. The magnitude of the reconstruction uncertainties will generally vary with the time scales (Briffa et al., 2001) and can be possibly underestimated if in prior analysis steps the proxy records have been screened according to their high covariance with instrumental records. As a large number of proxy records is usually screened, this high proxy-observation covariance could be due to chance (Osborn and Briffa, 2006). Another reason that could lead to an underestimation of the reconstruction uncertainties is the possible long term inhomogeneities or deterioration existing in the proxy records, that cannot be identified within the calibration period (Jones et al., 2009).

The CFR methods can, however, be tested using climate simulations as a test bed. In the virtual world of a climate simulation all variables are known at all times. CFR methods can be recreated in this world by producing pseudo-proxies, using the simulated temperature at the grid-cell level and contaminate these records with statistical noise, so that the link between pseudo-proxies and grid-cell temperature resembles the observed link between proxy-records and instrumental temperature. A very important assumption underlying all CFR methods relates to the general ability of the climate models to realistically simulate the spatial co-variance structure of the variable under consideration. This is difficult to assess, especially in the oceanic realm, which offers only a sparse observational network prior to 1980 (Reynolds et al., 2002). Taking into account the available re-analysis products, efforts can be undertaken to at least test the plausibility of state-of-the-art climate models in correctly simulating present-day ocean circulation and related quantities (Pyrina et al., 2017).

Given a realistic model simulation of the variable under consideration, the CFR methods can be then applied to the pseudo-proxy records and estimate a target variable, for instance the global, hemispheric or regional temperature. The pseudo-reconstruction can be then compared to the simulated target variable. The differences between the pseudo-reconstructed and simulated target variable can give information about the deficiencies of the statistical CFR. PPEs, also allow testing the sensitivity of the pseudo-reconstructions to changes in the density and location of the pseudo-proxy network.



The performance of CFRs has been tested using PPEs by a number of studies (Rutherford et al., 2003; Von Storch et al., 2004). Given the importance of the spatial information estimated in CFRs, a growing number of studies ~~has~~ explicitly evaluated the spatial performance of CFRs (Dannenberg and Wise, 2013; Evans et al., 2014; Li and Smerdon, 2012; Smerdon et al., 2008; Wang et al., 2014). However, only a few studies have tested the differences in the spatial performance of CRF methods according to the modelled climate that forms the basis of the PPE (Mann et al., 2007; Smerdon et al., 2016; Smerdon et al., 2011). These studies tested the spatial skill of CFR methods using information from a composite proxy network including mostly terrestrial proxies. As CFRs depend on the characteristics of the proxy network used, such as proxy temporal resolution, growth season, character and level of noise, in our analysis we test CFR methods in the context of the annually resolved marine proxy network of *Arctica islandica*. The multivariate linear regression techniques tested are Principal Component Regression (PCR) and Canonical Correlation analysis (CCA). PCR has been previously used to reconstruct climate using only marine proxy records (Evans et al., 2002; Marchal et al., 2002), while both methods have been commonly applied in the context of CFRs using annually resolved proxies (Gómez-Navarro et al., 2015; Smerdon et al., 2016; Smerdon et al., 2011). A fundamental assumption of PPEs is that the models can realistically simulate the spatiotemporal characteristics of the observed climate. Therefore, the models that are used in this analysis were chosen based on their ability to simulate the spatiotemporal characteristics of observed NA SSTs and have been previously evaluated in the context of paleoclimate reconstructions (Pyrina et al., 2017).

## 2 Data and Methodology

We performed a PPE using modelled and reanalyzed grid point SSTs co-located with proxy sites of *Arctica islandica*. The grid point SSTs were taken from the ~~General Circulation Models (GCMs)~~ CCSM4 and MPI-ESM-P, as well as the centennial in-situ observation-based estimate of SSTs, COBE2 (Hirahara et al., 2014). The SSTs are analysed for the summer period (June–August) and for the NA region between 60° W – 30° E and 40° N – 75° N, motivated by the growing season of ~~the bivalve shell~~ *Arctica islandica* (Schöne et al., 2004; Schöne et al., 2005). The pseudo-proxy sample sites are based on five real world proxy sites of *Arctica islandica* including collection sites in the North Sea (NS: 1°E, 58.5°N) (Witbaard et al., 1997), the Irish Sea (IrS: 5°W, 52.5°N) (Butler et al., 2009), the coast of Scotland (Sct: 7°W, 56.5°N) (Reynolds et al., 2013), the North Icelandic Shelf (IS: 20°W, 66.5°N) (Butler et al., 2013) and a location at Ingoya Island (InI: 24°E, 71.5°N) (Mette et al., 2015).

### 2.1 Data

#### 2.1.1 Observational and Proxy data

We used the spatially interpolated reanalysis data set COBE2 (Hirahara et al., 2014). The COBE2 data set was developed by the Japanese Meteorological Agency, covers the period 1850–2013 AD and has a spatial resolution of 1°x1° lat x lon. COBE2 data pass ~~first~~ quality control using combined a-priori thresholds and nearby ~~observations~~ and are later gridded using optimal interpolation. Data up to 1941 were bias-adjusted using "bucket correction" (Hirahara et al. 2014). COBE2 combines SST measurements from the release 2.0 of the International Comprehensive Ocean-Atmosphere Data Set, ICOADS (Worley et al., 2005), the Japanese Kobe collection, and readings from ships and buoys. The proxy data of *Arctica islandica* used in this analysis were downloaded from NOAA's (National Oceanic and Atmospheric Administration) National Centers for Environmental Information (NCEI, <https://www.ncdc.noaa.gov/data-access/paleoclimatology-data/datasets>) and refer to the 1357-year *Arctica islandica* reconstructed chronology from Butler et al., 2013. The multi-centennial absolutely dated chronology was reconstructed using annual growth increments in the shell of *Arctica islandica* and spans the period from 649 AD to 2005 AD.



### 2.1.2 Models

Two models are employed in this study, the CCSM4 model and the MPI-ESM-P model, which are part of the 5th phase of the  
 115 Climate Model Intercomparison Project (CMIP5/ <http://cmip-pcmdi.llnl.gov/cmip5/>). The models' original output was re-processed and re-gridded to a regular grid for subsequent comparisons with the COBE2 data set. Therefore, the output was re-gridded onto a  $1^\circ \times 1^\circ$  horizontal resolution. The output of the models used in this study includes the combination of ~~the~~ past1000 runs and ~~the~~ historical runs, so that the period used spans from 850 AD to 1999 AD.

120 The CCSM4 (Gent et al., 2011) uses the atmosphere component Community Atmosphere Model, version 4 (CAM4) (Neale et al., 2013) and the land component Community Land Model, version 4 (CLM4) (Lawrence et al., 2012). Both components share the same horizontal grid ( $0.9^\circ$  latitude  $\times$   $1.25^\circ$  longitude). The CCSM4 ocean component model (POP2) is based on the "Parallel Ocean Program", version 2 (Smith et al., 2010). The ocean grid has  $320 \times 384$  points with nominally  $1^\circ$  resolution except near the equator, where the latitudinal resolution becomes finer to better simulate ENSO dynamics, as described in (Danabasoglu et al.,  
 125 [2006](#)). CICE4, the CCSM4 sea ice component model is based on version 4 of the Los Alamos National Laboratory "Community Ice Code" sea ice model (Hunke et al., 2008). The atmosphere, land, and sea ice components exchange both state information and fluxes through the coupler for every atmospheric time step. The fluxes between atmosphere and ocean are calculated in the coupler and communicated to the ocean component only once a day. The CCSM4 simulation starts at 850 AD and continues to 1850 AD, where it matches up and is extended as an additional ensemble member of the CCSM4 twentieth  
 130 century simulations that ends in December 2005 (Landrum et al., 2013). The forcings and boundary conditions follow the protocols of PMIP3 (Paleoclimate Modelling Intercomparison Project Phase III) (<https://pmip3.lscce.ipsl.fr/wiki/doku.php/pn>  [design:lm:final](#)) as discussed by (Schmidt et al., 2012). For the volcanic forcing the ice core based index of Gao et al., 2008 is used where several large volcanic eruptions have significantly larger aerosol optical depth compared to the Crowley et al., 2008 reconstruction for PMIP3. Stratospheric aerosols are prescribed in the model  
 135 as a fixed single-size distribution in three layers in the lower stratosphere, above the tropopause. Changes in Total Solar Irradiance (TSI) are prescribed using the Vieira et al., 2011 reconstruction merged to Lean et al., 2005 at 1834 to have a smooth transition to twentieth-century CCSM simulations. The Pongratz et al., 2008 reconstruction of land use, proposed by PMIP3, is merged with that of Hurr et al., 2009 used in the CCSM4 twentieth-century simulations to give a consistent and seamlessly evolving land use change.

140 In MPI-ESM-P the atmosphere model ECHAM6 (Stevens et al., 2013) was integrated using a horizontal resolution of spectral truncation T63 (1.875), while the ocean/sea-ice model MPIOM (Marsland et al., 2003) features a conformal mapping grid with nominal  $1.5^\circ$  resolution. There is one grid pole over Antarctica and one grid pole over Greenland, which leads to considerably higher resolution in the NA. For land and vegetation the component JSBACH (Reick et al., 2013) is used and for  
 145 the marine biogeochemistry the HAMOCC5 (Ilyina et al., 2013). The coupling at the interfaces between atmosphere and land processes, and between atmosphere and sea ice occurs at the atmospheric time step, which is also the time step of the land processes, except for the dynamic vegetation, which is updated once a year. The coupling between atmosphere and ocean as well as land and ocean occurs once a day. In the past1000 simulations a prescribed  $\text{CO}_2$  forcing is used. For volcanic aerosol optical depth and effective radius the Crowley and Unterman reconstruction (Crowley and Unterman, 2013) is employed and the  
 150 Pongratz et al., 2008 reconstruction of global land-cover and agricultural areas. For solar radiation the model was driven by the combined Vieira et al., 2011 TSI reconstruction over the Holocene with the Wang et al., 2005 data set that provides the recommended solar forcing for the CMIP5 20th-century (1850–2005 AD) simulations.



In this work we used three experiments of the MPI-ESM model. The r1 and r2 experiments were initialized with the same ocean state, but they differ in the standard deviation of the assumed lognormal distribution of the volcanic aerosol size, while the simulations r2 and r3 use the same parameter setting but are started from different initial conditions (Jungclaus et al., 2014). For the historical simulations the applied boundary conditions follow the CMIP5 protocol, except for land-cover-changes, where the Pongratz et al. 2008 data set is used.

## 2.2 Methodology

Based on five proxy locations of *Arctica islandica* we reconstructed the summer SST evolution of the NA region, during the industrial (1850–1999 AD) period of the last millennium, using two CFR methods. In both approaches the goal is to reconstruct the spatially resolved SST fields (i.e. the predictand) using the grid point SSTs co-located with the real proxy locations (i.e. the predictors). To test the stationarity assumption of the calibration coefficients we repeat the reconstruction of the summer SSTs by calibrating our regression models for different calibration periods. The calibration periods include time spans during (a) the medieval period (1000-1049 AD), (b) the little ice age (1650-1699 AD), (c) the industrial period (1850-1999 AD), (d) the preindustrial period (850-1849 AD) and (e) recent years (1950-1999 AD). The NA fields' inter-annual anomalies were reconstructed using the COBE2 reanalyzed SSTs and the CMIP5 modelled SSTs. To conclude whether the usage of different models or of reanalysis data has an effect on the reconstruction we correlated the original modelled or reanalyzed inter-annual anomalies of the NA field with the reconstructed modelled or reanalyzed inter-annual detrended anomalies, respectively. In addition, we compared the temporal variances at grid-cell scale of the reconstructed and modelled SSTs.

### 2.2.1 Principal Component Regression

The first step of the PPE is the estimation of the NA SST field co-variances for the different calibration periods using Principal Component Analysis (PCA), (Eq. 1). Each eigenvector is associated with a spatial pattern (EOF, Empirical Orthogonal Function) and its temporal evolution (PC, Principal Component). In Eq. (1),  $\vec{x}_t$  is the field vector of the NA SST anomalies and  $i$  the number of eigenvectors. In our analysis we kept the first 10 eigenvectors, as they represent more than 90% of variability. The time,  $t$ , depends on the calibration period that we refer to.

$$\vec{x}_t = \sum_{i=1}^{10} PC_{i,t} \overline{EOF}_i, \quad (1)$$

For the five sampled SST time series ( $Proxy_{j,t}$  with  $j$  representing the respective proxy location) we calibrated our regression model (Eq. 2) against the PCs estimated during the calibration period, and predicted the calibration coefficients,  $\alpha$ , using PCR.

$$PC_{i,t} = \sum_{j=1}^{10} \hat{\alpha}_{i,j} Proxy_{j,t} + \varepsilon \quad (2)$$

In our approach we assume that the PCs are linearly related to the pseudo-proxies, so that they represent large-scale climate variations for the SST fields. This relationship is modelled through a disturbance term or error variable  $\varepsilon$ . The error could be an unobserved random variable that adds noise to the linear relationship between the dependent variable (PC) and the regressors (Proxy SSTs). Based on PCR (Eq. 3) we then predict the principal components  $\widehat{PC}_{i,t}$  during the reconstruction period, assuming that the calibration coefficients calculated in Eq. (2), are stationary in time. In this case the time,  $t$ , depends on the reconstruction period that we refer to.

$$\widehat{PC}_{i,t} = \sum_{j=1}^{10} \alpha_{i,j} Proxy_{j,t} \quad (3)$$

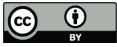

Assuming that the dominant patterns of climate variability are similar in recent and past centuries, we predict the  $\vec{\bar{x}}_t$  field vector of the NA SST anomalies for the reconstruction period, using the predicted  $\vec{\bar{P}}_{i,t}$  and the  $\vec{\bar{E}OF}_i$  patterns calculated in Eq. (1). This stationarity assumption holds at least for multi-decadal timescales and allows us to deduce back in time the surface temperature patterns (Mann et al., 1998).

### 2.2.2 Canonical Correlation Analysis

The first step of the PPE using CCA is the eigenvalue decomposition and subsequent truncation of the NA SST field and the proxy SST field (Eq. 1), during the calibration interval. The key feature of this analysis involves concatenating the pseudo-proxy SST time series, or in other words the predictor data, so that we can define both the time and space evolution of the climate system. After the transformation of the data to EOF coordinates we retained five empirical orthogonal functions, for each field, that were subsequently used to calculate the pairs of Canonical Correlation Patterns (CCP<sup>NA</sup>, CCP<sup>PR</sup>) and their time depended Canonical Coefficients (CC<sup>NA</sup>, CC<sup>PR</sup>), as shown in Eq. (4) and Eq. (5) for the NA SST field and the proxy SST field, respectively. For each estimated CCP the correlation between the respective CCs is maximized and not correlated with the CCs of another pair of patterns. Therefore, the CCs fulfill the condition of orthogonality.

$$\vec{\bar{x}}_t = \sum_{i=1}^5 CC_{i,t}^{NA} \vec{\bar{C}CP}_i^{NA} \quad (4)$$

$$\vec{\text{Proxy}}_t = \sum_{i=1}^5 CC_{i,t}^{PR} \vec{\bar{C}CP}_i^{PR} \quad (5)$$

The steps following, are the same as the ones used in the method PCR, but instead of regressing  predicting the PCs we use the CC<sup>PR</sup>. To reconstruct the  $\vec{\bar{x}}_t$  field vector of the NA SST anomalies we used the predicted  $\vec{\bar{C}CP}_i^{PR}$  and the  $\vec{\bar{C}CP}_i^{NA}$  patterns calculated in Eq. (4).

### 2.2.3 Noise addition

The PPEs were conducted using idealized pseudo-proxies and noise-contaminated pseudo-proxies. Idealized pseudo-proxies are the raw grid point SSTs, from simulations or reanalysis, co-located with the collection sites of the bivalve shell *Arctica islandica*, while in the case of the noise-contaminated pseudo-proxies the grid point temperatures are deteriorated by adding statistical noise in order to mimic more realistically the real world proxy records of *Arctica islandica*. The exact level of non-climatic noise in the real proxies is usually not known and could be strongly dependent on the nature of the proxy indicator (von Storch et al., 2009).

The dynamics of many physical processes can be approximated by first or second order ordinary linear differential equations, whose discretized versions can be represented by autoregressive processes (Von Storch and Zwiers, 2001). An autoregressive processes of order k=0, where k is the time lag, is white noise ( $Z_t$ ). An autoregressive processes of order k=1, or AR(1), represents a discretized first order linear differential equation and can be written as:

$$X_t = \alpha_1 X_{t-1} + Z_t \quad (6)$$

where  $\alpha_1$  is the damping coefficient and  $Z_t$  represents a random variable uncorrelated in time. The Yule-Walker equations can be used to derive the first k+1 elements of the autocorrelation function and for an AR(1) process they give  $\alpha_1 = \rho_1$ , where  $\rho_k$  is the autocorrelation for lag k. For a positive damping coefficient, an AR(1) process is unable to oscillate. Its 'spectral peak' is located at frequency  $\omega=0$  and therefore the variation  $X_t$  behaves as red noise. Furthermore, the stationarity condition for an AR(1) process implies that  $|\alpha_1| < 1$ . Therefore, to approximate the variation of noise in *Arctica islandica* the autocorrelation function of



an *Arctica islandica* chronology located at the Icelandic shelf was calculated and found equal to 0.4 at lag 1 year. Assuming that the relative amount of noise is constant for all the noise-contaminated pseudo-proxies, red noise pseudo-proxies were constructed by fitting the parameters of the AR(1) process to the simulated grid-point temperatures.  

### 3 Results

#### 3.1 Ideal pseudo-proxies

In this section the results are based on five ideal pseudo-proxies co-located to *Arctica islandica* sites that are “sampled” from the SST output fields of three realizations of the MPI-ESM model, the CCSM4 model and the COBE2 data set. The correlation between the reconstructed and the original SST-anomaly evolution of the NA field is calculated for the industrial reconstruction period and for the two different reconstruction methods. The methods are calibrated during the Medieval Period, the Little Ice Age (LIA), the recent period, the industrial period and the preindustrial period, and the results are shown in the Appendix (Figures 1S-5S). The results shown here regard the reconstruction of the industrial period when the regression models are calibrated during the recent period and LIA (Fig. 1 and Fig. 2 respectively), and are shown for the CCSM4 model, the realization r1 of the MPI-ESM model and the COBE2 data. Verification experiments were performed to test how well the calibration coefficients work when the reconstruction interval is the same as the calibration interval; see in the Appendix Fig. 4S and Fig. 5S. Moreover, the ratio of the estimated Standard Deviation (SD) according to the reconstructed SST-anomaly evolution of the NA field and the estimated SD according to the original SST-anomaly evolution was calculated ( $SD_{\text{reconstruction}}/SD_{\text{original}}$ ) and shown in Fig. 1 and Fig. 2 for the recent and LIA calibration periods, respectively.

Looking at the results of the same model simulation and method but for different calibration periods we can see that the spatial skill of the reconstruction does not significantly change according to the calibration period of the regression models. Therefore, the calibration coefficients can be considered stationary. Additionally, the SST patterns shown by the correlation maps do not profoundly change when a different method is applied, indicating that with both methods the SST evolution of the eastern NA basin can be reconstructed using only five proxy locations of *Arctica islandica*. More pronounced differences are found between the pseudo-reconstructions conducted with each model and also with the pseudo-reconstruction using the reanalysis. For instance, when the industrial period is reconstructed using the recent calibration period (Fig. 1) according to CCSM4 and COBE2, the SSTs between Iceland and Norway can be skilfully reconstructed with a correlation coefficient approximately equal to  $r \approx +0.8$ , but according to MPI-ESM the skill drops for all realizations (Appendix, Fig. 3S). Another interesting finding is that the SSTs along the south-east coast of Greenland can be reconstructed with a good skill using the CCSM4 model ( $r \approx +0.9$ ), while the reconstruction skill drops for the COBE2 data ( $r \approx +0.7$ ) and the MPI-ESM model ( $r \approx +0.5$ ). The correlation maps provided from the CCSM4 model and the COBE2 data are more homogenous than the ones given by the MPI-ESM-P model. The areas that exhibit correlation values higher than  $r \approx +0.6$  are more widespread in CCSM4 and COBE2 compared to MPI-ESM-P. The standard deviation ratios indicate that variance is mostly preserved in areas where field correlations are high. According to both models and the COBE2 reanalysis data, PCA results to a loss in variance in most of the NA basin, with the largest decrease occurring over the West Atlantic basin. Generally, the CCA derived CFRs are also afflicted by a loss in variance, but enhanced variance is found over the West and South NA basin.

#### 3.2 Noise contaminated pseudo-proxies

The results of this section are illustrated as in section 3.1, but the calculations were performed with noise-contaminated pseudo-proxies. The methods calibrated during the recent period and LIA are shown in Fig. 3 and Fig. 4, respectively, for the CCSM4



model, the realization r1 of the MPI-ESM model and the COBE2 data. Compared to the results regarding the ideal pseudo-proxies, the reconstruction skill has decreased with the maximum correlation between the reconstructed and the original SST-anomaly evolution of the proxy sites reaching  $r=+0.8$ , depending on the model used and the pseudo-proxy location (Appendix Figs. 1S-5S). The areas that exhibit correlation with values higher than  $r=+0.6$  are more limited in extend when compared to the idealized PPE. According to both methods, the eastern part of the NA can be skilfully reconstructed with the proxy sites of Arctica islandica. The differences amongst models are more profound than the differences amongst the different calibration periods.

Whilst in most cases the results regarding the reconstruction of the eastern Atlantic basin do not profoundly change according to the reconstruction method and the calibration period, the CCSM4 model shows that those aspects might play an important role. When we compare the results of the CCSM4 model as calculated with the CCA method during the recent calibration period (Appendix, Fig. 3S) to the respective results calculated during the rest of the calibration periods (Appendix Figs. 1S-5S), the skill of the reconstruction of the east Atlantic basin appears higher in the Appendix Fig. 3S. Moreover, for the realizations r3 and r2 and for the LIA calibration period (Appendix, Fig. 2S) there is an anti-correlation of around  $r\sim-0.4$  over the West Atlantic, an aspect shown also in the ideal PPE. These results indicate that the CCA method would be problematic regarding the reconstruction of the NA SSTs based on the r2 and r3 realizations, even though this anti-correlation might be of no physical meaning. According to the noise contaminated experiment, the standard deviation ratios indicate that the CFRs conducted using either the PCA or the CCA method are afflicted with a loss in variance over the whole NA basin.

### 3.3 Test of proxy locations

In the following chapter we test the contribution of the different Arctica islandica proxy sites on the reconstruction skill. We reconstructed the NA SSTs during the industrial period and calibrated our regression models during the recent period, according to (a) the sites on the Icelandic Shelf and North Sea (Figures with NP=2) and (b) the sites on the Icelandic Shelf, North Sea and Ingoya Island (Figures with NP=3). The reconstruction is performed with both statistical methods, using ideal proxies (Appendix, Fig. 6S) and noise contaminated proxies (Appendix, Fig. 7S). In Fig. 5 the results using three Arctica islandica sites are shown for both ideal proxies and noise contaminated proxies.

Regarding the ideal PPE (Appendix, Fig. 6S), only the results of the r2 realization of the MPI-ESM-P model indicate that the PCA method leads to a greater reconstruction skill than the respective results according to the CCA method. That applies in both cases, for two and three proxy locations. Moreover, anti-correlation between the reconstructed and original SST evolution occurs with the CCA method, mostly when only two proxy sites are used. Additionally, the differences amongst models and amongst models and data are more profound for the CCA method than for the PCA, because the number of CCPs that can be used for the CFR is limited by the number of proxies used (two CCPs for NP=2 and three CCPs for NP=3). Comparing the results of Fig. 5, regarding the reconstruction using three Arctica sites, to the corresponding results of Fig. 1 that are based on the reconstruction using five Arctica sites, we see that in most cases the sites in the Irish Sea and the off the coast of Scotland do not only contribute to the reconstruction of the SSTs on their surrounding waters but they additionally increase the reconstruction skill over the east Atlantic basin.

Regarding the noise-contaminated PPE (Appendix, Fig. 7S), the results indicate that the PCA method leads to a greater reconstruction skill. Generally, when the CCA method is used regions of anti-correlation are apparent in the pseudo-proxy results





300 of the r1 and r3 realizations of the MPI-ESM model and of the COBE2 data. Comparing the Appendix Fig. 7S to the Appendix  
Fig. 3S for the contaminated experiment, we see that the addition of the sites in the Irish Sea and the coast of Scotland also  
results in an increase of the reconstruction skill of the east Atlantic basin for all models and data, and for both methods. The  
reason that the sites in the Irish Sea and the coast of Scotland increase the overall reconstruction skill is that the oceanographic  
variability of the western British Isles is dominated by the northward transport of warm saline waters advected by the North  
305 Atlantic Current (Inall et al., 2009).

## 4 Discussion

### 4.1 Stationarity of the calibration coefficients

Both CFR methods showed that the spatial skill of the reconstruction does not profoundly change according to the period during  
which the regression models were calibrated, even when the calibration period chosen relates to the recent period, a period  
310 dominated by anthropogenic forcing. This result is robust amongst models and amongst models and data and could be an  
indication that the NA basin leading modes of SST variability remain stationary during several periods of the last millennium for  
different climatic background states. However, changes in teleconnections on multi-decadal to centennial time scales in control  
model simulations or externally forced simulations have been proposed by several studies (Gallant et al., 2013; Müller and  
Roeckner, 2008). Regarding the NA basin, non-stationary AMO-like variability emerges in climate simulations and proxy-data  
315 covering the last half millennium (Enfield and Cid-Serrano, 2006). Apparent non-stationarity in multi-decadal to centennial (and  
even longer) AMO fluctuations is also found in a multi-millennial unforced climate simulation (Zanchettin et al., 2010). For  
longer time scales, Zanchettin et al., 2013 investigated the basin-scale leading modes of SST variability for the extra-tropical NA  
in a five-member full-forcing ensemble simulation covering the period 800–2005 AD and in a multi-millennial control run  
describing an unforced climate. In contrast to those previous results, these authors found that the simulated SST modes, during  
320 such long time intervals, describe regional SST variability patterns in the NA consistent with those simulated and observed over  
the last 160 years.

Another reason that could potentially explain the similarities of the reconstruction skill amongst different calibration periods  
could be that the relationship of the SSTs of the regions where the proxies are located and the modes of variability that influence  
325 the NA basin remain unchanged. Lohmann et al., 2005 found that during the period 1900–1998 AD the Arctic Oscillation-related  
temperature teleconnections, show weak decadal variations in some regions of the NA. The Arctic Oscillation signature in  
climate variables was detectable also during the spring season, which is of practical relevance as the climate information  
obtained from most terrestrial and marine proxy archives is more linked to the growing season rather than to winter (Cook et al.,  
2002). The NA regions that Lohmann et al., 2005 identified with stable teleconnections include almost all the proxy locations  
330 used in our study (see in Lohmann et al., 2005; Fig. 4), but their analysis regards only the recent period and decadal variations.  
Regarding the North Atlantic Oscillation (NAO), variable teleconnections have been detected in coupled ocean-atmosphere  
model simulations (Raible et al., 2001; Zorita and González-Rouco, 2002). Moreover, model inaccuracies in the representation  
of the mean NA climate, NAO and other modes of climate variability that influence the NA SSTs could lead to a poor  
representation of the NA regions. However, as CFRs are covariance-based approaches, a poor representation would lead to a  
335 generally low reconstruction skill in the NA basin, which is not consistent with the results of this study. Therefore, a more  
plausible reason that explains the similarities of the reconstruction skill amongst different calibration periods lies to the  
minimization of possibly existing non-stationarities by using proxy sites from multiple regions (Batehup et al., 2015).



#### 4.2 Model and method dependent spatial skill

As presented above, more profound spatial differences in the reconstruction skill are found for the different model simulations, rather than for the different periods in the last millennium that were used to calibrate the regression models. The pseudo-proxy results of the CCSM4 model are found to be closer to the pseudo-proxy results of the COBE2 data set, than the ones calculated based on the MPI-ESM-P model. ~~In the study of Pyrina et al. 2017, and in terms of EOFs~~ for the summer means during the period 1950-1999 AD for the NA, ~~it is~~ found that the leading patterns of SST variability as given by the COBE2 show more similarities to the EOFs calculated by the CCSM4 model than to the ones calculated by the MPI-ESM-P model. Moreover, the teleconnection patterns of the Icelandic Shelf and North Sea proxy sites to the SSTs of the NA basin were evaluated and the CCSM4 model was again found to be closer to the teleconnection maps shown by COBE2 in terms of both, resemblance of magnitude and spatial patterns. Therefore, as the large scale SST variability of NA basin of the CCSM4 model was found to be closer to the observational data, ~~this could be the reason for~~ the resemblance of the COBE2 reconstruction skill by the CCSM4 model. Another interesting finding relates to the fact that the SSTs on the path of the east Greenland current can be reconstructed with a good skill only with the CCSM4 model, and this is one of the points where the CCSM4 model does not agree with the COBE2 data (Fig. 1, Fig. 3). The reason ~~in this case~~ could be the COBE2 data set, as there is a suspect abrupt jump in the SSTs of the regions north of Iceland in the COBE2 dataset (see in Loder et al. 2015; their Fig. 7).

The usage of MPI-ESM-P leads to more heterogeneous correlation maps. Even though the ocean component of the CCSM4 model has over most regions ~~a higher spatial resolution~~ than the MPI-ESM-P, in the NA Ocean the ocean component of the MPI-ESM-P model has considerably higher spatial resolution on the original curvilinear model grid. ~~That~~ technical characteristic could explain the more heterogeneous results of the MPI-ESM-P in the NA area. Differences between the two models could also arise from the slightly different volcanic forcing used. Booth et al., 2012 found that aerosol concentration changes influence the simulated spatial response of the SSTs. In addition, differences between the two models could also arise from the implementation of the aerosol component which is prescribed in the MPI-ESM model and interactive in the CCSM4. Rotstayn et al., 2010 found an improvement of the Australian mean seasonal climate by including in the CSIRO model an interactive aerosol scheme. The effect ~~to the~~ reconstruction skill due to a change in the standard deviation of the volcanic forcing can be seen by the comparison between the ensemble members r1 and r2 of the MPI-ESM model. These members are integrated with the same model version, started with the same ocean state, but with volcanic aerosol size equal to 1.2  $\mu\text{m}$  in r1 and 1.8  $\mu\text{m}$  in r2.

The differences of the reconstruction skill according to CCA or PCR can be better identified in the case of the MPI-ESM model, ~~because of the~~ spatially more heterogeneous correlations between the original and the reconstructed SST anomalies. For the reconstruction of the NA SSTs using the PCR method, we ~~take advantage of~~ the dominant patterns of SST variability of the NA basin, while with the usage of the CCA method we exploit only those patterns with time histories related to the time histories of the proxy network. In the case of five proxy locations, and even worse of three and two, we see that this method is problematic because we lose information due to the limited number of CCP<sup>PT</sup> that can be derived from our small sized proxy network. Moreover, the differences in the methods can be better seen when we use the noise contaminated pseudo-proxies, as in this case the loss of information is greater, because the noise contaminated pseudo-proxies do not explain 100% of the SST signal.

Regarding the ideal experiment, PCA generally leads to an underestimation of variance over the whole NA basin, while it preserves more variance in regions where correlation coefficients are largest. The CCA method enhances variance on the south and west part of the study region depending on the model simulation used as the basis for the PPE. Regarding the noise-



contaminated experiment both methods lead to a loss in variance. The decrease in variance can be expected for regression-based CFR methods that blend signal and error variances as a characteristic of formulation (e.g. von Storch et al., 2004). The source of a loss in variance is likely associated with the manner in which the eigenvalue spectra are truncated by the two methods (Smerdon et al., 2010).

## 5 Conclusions

From the PPEs derived herein we have demonstrated that a small sized proxy network of the marine bivalve mollusk *Arctica islandica* (five proxy locations) can produce skilful spatial SST reconstructions for the eastern NA basin. The tested CFR methods can alter the spatial skill of the reconstruction especially when noise contaminated pseudo-proxies are used. Therefore, it is important to assess CFR methods with noise-contaminated proxies, rather than with ideal ones. Moreover, the CFRs conducted by both methods suffer variance losses. Even though the CCA method is problematic when a significantly low number of proxies is used (two and three proxies), the spatial skill of the reconstruction using CCA and five proxy locations is similar to the results calculated with the PCR method. The calibration period does not significantly affect the reconstruction, while the most profound changes in the spatial skill of the reconstruction are caused by the model simulation used.

## Author Contributions

The analysis was performed by M. Pyrina with the consultation of S. Wagner and E. Zorita. M. Pyrina prepared the manuscript with contributions of co-authors.

## Acknowledgements

The work was carried out in the framework of the European Initial Marie Curie Training network ARAMACC (Annually resolved Archives of Marine Climate Change). This project has received funding from the European Union's Seventh Framework Programme for research, technological development and demonstration under grant agreement no 604802. The authors thank the CCSM4 and MPI-ESM modelling groups participating in the CMIP5 initiative for providing their data and the authors of the COBE2 data set for making their data available.

## References

- Ahmed, M., Anchukaitis, K. J., Asrat, A., Borgaonkar, H., Braida, M., Buckley, B. M., Büntgen, U., Chase, B. M., Christie, D. A., and Cook, E. R.: Continental-scale temperature variability during the past two millennia, *Nature Geoscience*, 6, 339-346, 2013.
- Batehup, R., McGregor, S., and Gallant, A.: The influence of non-stationary teleconnections on palaeoclimate reconstructions of ENSO variance using a pseudoproxy framework, *Climate of the Past*, 11, 1733-1749, 2015.
- Booth, B. B., Dunstone, N. J., Halloran, P. R., Andrews, T., and Bellouin, N.: Aerosols implicated as a prime driver of twentieth-century North Atlantic climate variability, *Nature*, 484, 228-232, 2012.
- Briffa, K. R., Osborn, T. J., Schweingruber, F. H., Harris, I. C., Jones, P. D., Shiyatov, S. G., and Vaganov, E. A.: Low frequency temperature variations from a northern tree ring density network, *Journal of Geophysical Research: Atmospheres*, 106, 2929-2941, 2001.

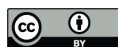

- Butler, P. G., Scourse, J. D., Richardson, C. A., Wanamaker, A. D., Bryant, C. L., and Bennell, J. D.: Continuous marine radiocarbon reservoir calibration and the 13 C Suess effect in the Irish Sea: Results from the first multi-centennial shell-based marine master chronology, *Earth and Planetary Science Letters*, 279, 230-241, 2009.
- Butler, P. G., Wanamaker, A. D., Scourse, J. D., Richardson, C. A., and Reynolds, D. J.: Variability of marine climate on the  
415 North Icelandic Shelf in a 1357-year proxy archive based on growth increments in the bivalve *Arctica islandica*, *Palaeogeography, Palaeoclimatology, Palaeoecology*, 373, 141-151, 2013.
- Cook, E. R., D'Arrigo, R. D., and Mann, M. E.: A well-verified, multiproxy reconstruction of the winter North Atlantic Oscillation Index since ad 1400\*, *Journal of Climate*, 15, 1754-1764, 2002.
- Crowley, T. and Unterman, M.: Technical details concerning development of a 1200 yr proxy index for global volcanism, *Earth  
420 System Science Data*, 5, 187-197, 2013.
- Crowley, T. J., Zielinski, G., Vinther, B., Udisti, R., Kreutz, K., Cole-Dai, J., and Castellano, E.: Volcanism and the little ice age, *PAGES news*, 16, 22-23, 2008.
- Dahlgren, T., Weinberg, J., and Halanych, K.: Phylogeography of the ocean quahog (*Arctica islandica*): influences of  
paleoclimate on genetic diversity and species range, *Marine Biology*, 137, 487-495, 2000.
- 425 Danabasoglu, G., Large, W. G., Tribbia, J. J., Gent, P. R., Briegleb, B. P., and McWilliams, J. C.: Diurnal coupling in the tropical oceans of CCSM3, *Journal of climate*, 19, 2347-2365, 2006.
- Dannenberg, M. P. and Wise, E. K.: Performance of climate field reconstruction methods over multiple seasons and climate variables, *Journal of Geophysical Research: Atmospheres*, 118, 9595-9610, 2013.
- Dowsett, H. J. and Robinson, M. M.: Mid-Pliocene equatorial Pacific sea surface temperature reconstruction: a multi-proxy  
430 perspective, *Philosophical Transactions of the Royal Society of London A: Mathematical, Physical and Engineering Sciences*, 367, 109-125, 2009.
- Eagle, R., Eiler, J. M., Tripathi, A. K., Ries, J., Freitas, P., Hiebenthal, C., Wanamaker, A. D., Taviani, M., Elliot, M., and Marensi, S.: The influence of temperature and seawater carbonate saturation state on 13C-18O bond ordering in bivalve mollusks, *Biogeosciences*, 10, 2013.
- 435 Enfield, D. B. and Cid-Serrano, L.: Projecting the risk of future climate shifts, *International Journal of Climatology*, 26, 885-895, 2006.
- Evans, M., Smerdon, J. E., Kaplan, A., Tolwinski-Ward, S., and González-Rouco, J. F.: Climate field reconstruction uncertainty arising from multivariate and nonlinear properties of predictors, *Geophysical research letters*, 41, 9127-9134, 2014.
- Evans, M. N., Kaplan, A., and Cane, M. A.: Intercomparison of coral oxygen isotope data and historical sea surface temperature  
440 (SST): Potential for coral-based SST field reconstructions, *Paleoceanography*, 15, 551-563, 2000.
- Evans, M. N., Kaplan, A., and Cane, M. A.: Pacific sea surface temperature field reconstruction from coral  $\delta^{18}O$  data using reduced space objective analysis, *Paleoceanography*, 17, 2002.
- Gallant, A. J., Phipps, S. J., Karoly, D. J., Mullan, A. B., and Lorrey, A. M.: Nonstationary Australasian teleconnections and implications for paleoclimate reconstructions, *Journal of Climate*, 26, 8827-8849, 2013.
- 445 Gao, C., Robock, A., and Ammann, C.: Volcanic forcing of climate over the past 1500 years: An improved ice core- based index for climate models, *Journal of Geophysical Research: Atmospheres*, 113, 2008.
- Gent, P. R., Danabasoglu, G., Donner, L. J., Holland, M. M., Hunke, E. C., Jayne, S. R., Lawrence, D. M., Neale, R. B., Rasch, P. J., and Vertenstein, M.: The community climate system model version 4, *Journal of Climate*, 24, 4973-4991, 2011.
- Gómez-Navarro, J. J., Werner, J., Wagner, S., Luterbacher, J., and Zorita, E.: Establishing the skill of climate field  
450 reconstruction techniques for precipitation with pseudoproxy experiments, *Climate Dynamics*, 45, 1395-1413, 2015.



- Gray, S. T., Graumlich, L. J., Betancourt, J. L., and Pederson, G. T.: A tree-ring based reconstruction of the Atlantic Multidecadal Oscillation since 1567 AD, *Geophysical Research Letters*, 31, 2004.
- Hirahara, S., Ishii, M., and Fukuda, Y.: Centennial-scale sea surface temperature analysis and its uncertainty, *Journal of Climate*, 27, 57-75, 2014.
- 455 Hunke, E., Lipscomb, W., Turner, A., Jeffery, N., and Elliott, S.: CICE: the Los Alamos sea ice model, documentation and software, version 4.0. Los Alamos National Laboratory Tech. Rep, LA-CC-06-012, 2008.
- Hurttt, G. C., Chini, L. P., Frohling, S., Betts, R., Feddema, J., Fischer, G., Goldewijk, K. K., Hibbard, K., Janetos, A., and Jones, C.: Harmonisation of global land-use scenarios for the period 1500–2100 for IPCC-AR5, 2009. 2009.
- Ilyina, T., Six, K. D., Segschneider, J., Maier-Reimer, E., Li, H., and Núñez-Riboni, I.: Global ocean biogeochemistry model
- 460 HAMOCC: Model architecture and performance as component of the MPI-Earth system model in different CMIP5 experimental realizations, *Journal of Advances in Modeling Earth Systems*, 5, 287-315, 2013.
- Jones, P., Briffa, K., Osborn, T., Lough, J., Van Ommen, T., Vinther, B., Luterbacher, J., Wahl, E., Zwiers, F., and Mann, M.: High-resolution palaeoclimatology of the last millennium: a review of current status and future prospects, *The Holocene*, 19, 3-49, 2009.
- 465 Jr, A. D. W., Heinemeier, J., Scourse, J. D., Richardson, C. A., Butler, P. G., Eiriksson, J., and Knudsen, K. L.: Very long-lived mollusks confirm 17th century AD tephra-based radiocarbon reservoir ages for North Icelandic shelf waters, *Radiocarbon*, 50, 399-412, 2008.
- Jungclaus, J. H., Lohmann, K., and Zanchettin, D.: Enhanced 20th century heat transfer to the Arctic simulated in context of climate variations over last millennium, *Climate of the Past*, 10, 2201-2213, 2014.
- 470 Landrum, L., Otto-Bliesner, B. L., Wahl, E. R., Conley, A., Lawrence, P. J., Rosenbloom, N., and Teng, H.: Last millennium climate and its variability in CCSM4, *Journal of Climate*, 26, 1085-1111, 2013.
- Lawrence, D. M., Oleson, K. W., Flanner, M. G., Fletcher, C. G., Lawrence, P. J., Levis, S., Swenson, S. C., and Bonan, G. B.: The CCSM4 land simulation, 1850-2005: Assessment of surface climate and new capabilities, *Journal of Climate*, 25, 2240-2260, 2012.
- 475 Lean, J., Rottman, G., Harder, J., and Kopp, G.: *SORCE contributions to new understanding of global change and solar variability*. In: *The Solar Radiation and Climate Experiment (SORCE)*, Springer, 2005.
- Li, B. and Smerdon, J. E.: Defining spatial comparison metrics for evaluation of paleoclimatic field reconstructions of the Common Era, *Environmetrics*, 23, 394-406, 2012.
- Lohmann, G., Rambu, N., and Dima, M.: Where can the Arctic Oscillation be reconstructed? Towards a reconstruction of climate
- 480 modes based on stable teleconnections, *Climate of the Past Discussions*, 1, 17-56, 2005.
- Luterbacher, J., Dietrich, D., Xoplaki, E., Grosjean, M., and Wanner, H.: European seasonal and annual temperature variability, trends, and extremes since 1500, *Science*, 303, 1499-1503, 2004.
- Mann, M. E. and Jones, P. D.: Global surface temperatures over the past two millennia, *Geophysical Research Letters*, 30, 2003.
- Mann, M. E., Rutherford, S., Wahl, E., and Ammann, C.: Robustness of proxy-based climate field reconstruction methods,
- 485 *Journal of Geophysical Research: Atmospheres*, 112, 2007.
- Marchal, O., Cacho, I., Stocker, T. F., Grimalt, J. O., Calvo, E., Martrat, B., Shackleton, N., Vautravers, M., Cortijo, E., and van Kreveld, S.: Apparent long-term cooling of the sea surface in the northeast Atlantic and Mediterranean during the Holocene, *Quaternary Science Reviews*, 21, 455-483, 2002.
- Marcott, S. A., Shakun, J. D., Clark, P. U., and Mix, A. C.: A reconstruction of regional and global temperature for the past
- 490 11,300 years, *science*, 339, 1198-1201, 2013.

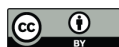

- Marsland, S. J., Haak, H., Jungclaus, J. H., Latif, M., and Röske, F.: The Max-Planck-Institute global ocean/sea ice model with orthogonal curvilinear coordinates, *Ocean modelling*, 5, 91-127, 2003.
- McGregor, H. V., Evans, M. N., Goosse, H., Leduc, G., Martrat, B., Addison, J. A., Mortyn, P. G., Oppo, D. W., Seidenkrantz, M.-S., and Sicre, M.-A.: Robust global ocean cooling trend for the pre-industrial Common Era, *Nature Geoscience*, 2015. 2015.
- 495 Mette, M. J., Wanamaker, A. D., Carroll, M. L., Ambrose, W. G., and Retelle, M. J.: Linking large-scale climate variability with Arctica islandica shell growth and geochemistry in northern Norway, *Limnology and Oceanography*, 2015. 2015.
- Moberg, A., Sonechkin, D. M., Holmgren, K., Datsenko, N. M., and Karlén, W.: Highly variable Northern Hemisphere temperatures reconstructed from low-and high-resolution proxy data, *Nature*, 433, 613-617, 2005.
- Müller, W. and Roeckner, E.: ENSO teleconnections in projections of future climate in ECHAM5/MPI-OM, *Climate dynamics*, 500 31, 533-549, 2008.
- Neale, R. B., Richter, J., Park, S., Lauritzen, P. H., Vavrus, S. J., Rasch, P. J., and Zhang, M.: The mean climate of the Community Atmosphere Model (CAM4) in forced SST and fully coupled experiments, *Journal of Climate*, 26, 5150-5168, 2013.
- Osborn, T. J. and Briffa, K. R.: The spatial extent of 20th-century warmth in the context of the past 1200 years, *Science*, 311, 841-844, 2006.
- 505 Pongratz, J., Reick, C., Raddatz, T., and Claussen, M.: A reconstruction of global agricultural areas and land cover for the last millennium, *Global Biogeochemical Cycles*, 22, 2008.
- Pyrina, M., Wagner, S., and Zorita, E.: Evaluation of CMIP5 models over the northern North Atlantic in the context of forthcoming paleoclimatic reconstructions, *Climate Dynamics*, doi: 10.1007/s00382-017-3536-x, 2017. 1-19, 2017.
- Raible, C., Luksch, U., Fraedrich, K., and Voss, R.: North Atlantic decadal regimes in a coupled GCM simulation, *Climate* 510 *Dynamics*, 18, 321-330, 2001.
- Reick, C., Raddatz, T., Brovkin, V., and Gayler, V.: Representation of natural and anthropogenic land cover change in MPI-ESM, *Journal of Advances in Modeling Earth Systems*, 5, 459-482, 2013.
- Reynolds, D. J., Butler, P., Williams, S., Scourse, J., Richardson, C., Wanamaker, A., Austin, W., Cage, A., and Sayer, M.: A multiproxy reconstruction of Hebridean (NW Scotland) spring sea surface temperatures between AD 1805 and 2010, 515 *Palaeogeography, Palaeoclimatology, Palaeoecology*, 386, 275-285, 2013.
- Reynolds, D. J., Richardson, C., Scourse, J., Butler, P., Hollyman, P., Roman-Gonzalez, A., and Hall, I. R.: Reconstructing North Atlantic marine climate variability using an absolutely-dated sclerochronological network, *Palaeogeography, Palaeoclimatology, Palaeoecology*, 465, 333-346, 2017.
- Reynolds, R. W., Rayner, N. A., Smith, T. M., Stokes, D. C., and Wang, W.: An improved in situ and satellite SST analysis for 520 climate, *Journal of climate*, 15, 1609-1625, 2002.
- Riedwyl, N., Küttel, M., Luterbacher, J., and Wanner, H.: Comparison of climate field reconstruction techniques: application to Europe, *Climate Dynamics*, 32, 381-395, 2009.
- Riedwyl, N., Luterbacher, J., and Wanner, H.: An ensemble of European summer and winter temperature reconstructions back to 1500, *Geophysical Research Letters*, 35, 2008.
- 525 Rotstayn, L. D., Collier, M. A., Dix, M. R., Feng, Y., Gordon, H. B., O'Farrell, S. P., Smith, I. N., and Syktus, J.: Improved simulation of Australian climate and ENSO-related rainfall variability in a global climate model with an interactive aerosol treatment, *International Journal of Climatology*, 30, 1067-1088, 2010.
- Rutherford, S., Mann, M., Delworth, T., and Stouffer, R.: Climate field reconstruction under stationary and nonstationary forcing, *Journal of Climate*, 16, 462-479, 2003.



- 530 Rutherford, S., Mann, M., Osborn, T., Briffa, K., Jones, P. D., Bradley, R., and Hughes, M.: Proxy-based Northern Hemisphere surface temperature reconstructions: sensitivity to method, predictor network, target season, and target domain, *Journal of Climate*, 18, 2308-2329, 2005.
- Schmidt, G., Jungclauss, J., Ammann, C., Bard, E., Braconnot, P., Crowley, T., Delaygue, G., Joos, F., Krivova, N., and Muscheler, R.: Climate forcing reconstructions for use in PMIP simulations of the Last Millennium (v1. 1), *Geoscientific Model Development*, 5, 185-191, 2012.
- 535 Schöne, B. R., Castro, A. D. F., Fiebig, J., Houk, S. D., Oschmann, W., and Kröncke, I.: Sea surface water temperatures over the period 1884–1983 reconstructed from oxygen isotope ratios of a bivalve mollusk shell (*Arctica islandica*, southern North Sea), *Palaeogeography, Palaeoclimatology, Palaeoecology*, 212, 215-232, 2004.
- Schöne, B. R., Houk, S. D., Castro, A. D. F., Fiebig, J., Oschmann, W., Kröncke, I., Dreyer, W., and Gosselck, F.: Daily growth rates in shells of *Arctica islandica*: assessing sub-seasonal environmental controls on a long-lived bivalve mollusk, *Palaios*, 20, 78-92, 2005.
- 540 Scourse, J., Richardson, C., Forsythe, G., Harris, I., Heinemeier, J., Fraser, N., Briffa, K., and Jones, P.: First cross-matched floating chronology from the marine fossil record: data from growth lines of the long-lived bivalve mollusc *Arctica islandica*, *The Holocene*, 16, 967-974, 2006.
- 545 Smerdon, J. E., Coats, S., and Ault, T. R.: Model-dependent spatial skill in pseudoproxy experiments testing climate field reconstruction methods for the Common Era, *Climate Dynamics*, 46, 1921-1942, 2016.
- Smerdon, J. E., Kaplan, A., and Chang, D.: On the Origin of the Standardization Sensitivity in RegEM Climate Field Reconstructions\*, *Journal of Climate*, 21, 6710-6723, 2008.
- Smerdon, J. E., Kaplan, A., Zorita, E., González-Rouco, J. F., and Evans, M.: Spatial performance of four climate field reconstruction methods targeting the Common Era, *Geophysical research letters*, 38, 2011.
- 550 Smerdon, J. E., A. Kaplan, D. Chang, and M. N. Evans: A pseudoproxy evaluation of the CCA and RegEM methods for reconstructing climate fields of the last millennium. *J. Climate*, 23, 4856–488, 2010
- Smith, R., Jones, P., Briegleb, B., Bryan, F., Danabasoglu, G., Dennis, J., Dukowicz, J., Eden, C., Fox-Kemper, B., and Gent, P.: The Parallel Ocean Program (POP) Reference Manual Ocean Component of the Community Climate System Model (CCSM) and Community Earth System Model (CESM), Rep. LAUR-01853, 141, 2010.
- 555 Stevens, B., Giorgetta, M., Esch, M., Mauritsen, T., Crueger, T., Rast, S., Salzmann, M., Schmidt, H., Bader, J., and Block, K.: Atmospheric component of the MPI-M Earth System Model: ECHAM6, *Journal of Advances in Modeling Earth Systems*, 5, 146-172, 2013.
- Tierney, J. E., Abram, N. J., Anchukaitis, K. J., Evans, M. N., Giry, C., Kilbourne, K. H., Saenger, C. P., Wu, H. C., and Zinke, J.: Tropical sea surface temperatures for the past four centuries reconstructed from coral archives, *Paleoceanography*, 30, 226-252, 2015.
- 560 Touchan, R., Xoplaki, E., Funkhouser, G., Luterbacher, J., Hughes, M. K., Erkan, N., Akkemik, Ü., and Stephan, J.: Reconstructions of spring/summer precipitation for the Eastern Mediterranean from tree-ring widths and its connection to large-scale atmospheric circulation, *Climate dynamics*, 25, 75-98, 2005.
- 565 Vieira, L. E. A., Solanki, S. K., Krivova, N. A., and Usoskin, I.: Evolution of the solar irradiance during the Holocene, *Astronomy & Astrophysics*, 531, A6, 2011.
- Von Storch, H., Zorita, E., and González-Rouco, F.: Assessment of three temperature reconstruction methods in the virtual reality of a climate simulation, *International Journal of Earth Sciences*, 98, 67-82, 2009.



- Von Storch, H., Zorita, E., Jones, J. M., Dimitriev, Y., González-Rouco, F., and Tett, S. F.: Reconstructing past climate from noisy data, *Science*, 306, 679-682, 2004.
- Von Storch, H. and Zwiers, F. W.: *Statistical analysis in climate research*, Cambridge university press, 2001.
- Wahl, E. R. and Ammann, C. M.: Robustness of the Mann, Bradley, Hughes reconstruction of Northern Hemisphere surface temperatures: Examination of criticisms based on the nature and processing of proxy climate evidence, *Climatic Change*, 85, 33-69, 2007.
- Wanamaker Jr, A. D., Butler, P. G., Scourse, J. D., Heinemeier, J., Eiríksson, J., Knudsen, K. L., and Richardson, C. A.: Surface changes in the North Atlantic meridional overturning circulation during the last millennium, *Nature Communications*, 3, 899, 2012.
- Wang, J., Emile-Geay, J., Guillot, D., Smerdon, J., and Rajaratnam, B.: Evaluating climate field reconstruction techniques using improved emulations of real-world conditions, *Climate of the Past*, 10, 1-19, 2014.
- Wang, Y.-M., Lean, J., and Sheeley Jr, N.: Modeling the Sun's magnetic field and irradiance since 1713, *The Astrophysical Journal*, 625, 522, 2005.
- Wilson, R., Tudhope, A., Brohan, P., Briffa, K., Osborn, T., and Tett, S.: Two-hundred-fifty years of reconstructed and modeled tropical temperatures, *Journal of Geophysical Research: Oceans*, 111, 2006.
- Witbaard, R., Duineveld, G., and De Wilde, P.: A long-term growth record derived from *Arctica islandica* (Mollusca, Bivalvia) from the Fladen Ground (northern North Sea), *Journal of the Marine Biological Association of the United Kingdom*, 77, 801-816, 1997.
- Worley, S. J., Woodruff, S. D., Reynolds, R. W., Lubker, S. J., and Lott, N.: ICOADS release 2.1 data and products, *International Journal of Climatology*, 25, 823-842, 2005.
- Xoplaki, E., Luterbacher, J., Paeth, H., Dietrich, D., Steiner, N., Grosjean, M., and Wanner, H.: European spring and autumn temperature variability and change of extremes over the last half millennium, *Geophysical Research Letters*, 32, 2005.
- Zanchettin, D., Rubino, A., and Jungclaus, J. H.: Intermittent multidecadal-to-centennial fluctuations dominate global temperature evolution over the last millennium, *Geophysical Research Letters*, 37, 2010.
- Zanchettin, D., Rubino, A., Matei, D., Bothe, O., and Jungclaus, J.: Multidecadal-to-centennial SST variability in the MPI-ESM simulation ensemble for the last millennium, *Climate dynamics*, 40, 1301-1318, 2013.
- Zhang, X., Yan, X., and Chen, Z.: Reconstructed Regional Mean Climate with Bayesian Model Averaging: A Case Study for Temperature Reconstruction in the Yunnan–Guizhou Plateau, China, *Journal of Climate*, 29, 5355-5361, 2016.
- Zorita, E. and González-Rouco, F.: Are temperature-sensitive proxies adequate for North Atlantic Oscillation reconstructions?, *Geophysical research letters*, 29, 2002.

### Figure Captions

- Figure 1: Correlation coefficient (columns 1 and 4) and SD ratio (columns 2 and 4) between the reconstructed and the original SST-anomaly evolution of the NA field during the industrial era. The results are given for the recent calibration period (1950–1999 AD) and for the two different reconstruction methods (1<sup>st</sup> and 2<sup>nd</sup> column CCA, 3<sup>rd</sup> and 4<sup>th</sup> column PCA) for the models CCSM4 (first row) and MPI-ESM-P r1 (second row) and the reanalysis data COBE2 (third row).
- Figure 2: Correlation coefficient between the reconstructed and the original SST-anomaly evolution of the NA field during the industrial era. The results are given for the LIA calibration period (1650–1699 AD) and for the two different reconstruction methods (1<sup>st</sup> and 2<sup>nd</sup> column CCA, 3<sup>rd</sup> and 4<sup>th</sup> column PCA) for the models CCSM4 (first row) and MPI-ESM-P r1 (second row).
- Figure 3: Same as in Fig. 1, but for the noise-contaminated pseudo-proxies.





Figure 4: Same as in Fig. 2, but for the noise-contaminated pseudo-proxies.

615 Figure 5: Correlation coefficient between the reconstructed and the original SST-anomaly evolution of the NA field during the industrial era for the ideal (columns 1 and 3) and the noise contaminated experiment (columns 2 and 4) when the number of proxy locations used is NP=3. The results are given for the recent calibration period (1950—1999 AD), for two different reconstruction methods (1<sup>st</sup> and 2<sup>nd</sup> column CCA, 3<sup>rd</sup> and 4<sup>th</sup> column PCA) and for the models CCSM4 (first row) and MPI-ESM-P r1 (second row), and the reanalysis data COBE2 (third row).

#### APPENDIX figure captions

620 Figure 1S: Correlation coefficient between the reconstructed and the original SST-anomaly evolution of the NA field for the ideal (column 1 and 3) and the noise contaminated experiment (column 2 and 4). The results are given for the MCA calibration period (1000—1049 AD) and for the two different reconstruction methods (1<sup>st</sup> and 2<sup>nd</sup> column CCA, 3<sup>rd</sup> and 4<sup>th</sup> column PCA) for the models CCSM4 (1<sup>st</sup> row) and three realizations of the MPI-ESM-P model (2<sup>nd</sup>, 3<sup>rd</sup> and 4<sup>th</sup> row).

625 Figure 2S: As in Fig. 1S, but the results are given for the LIA calibration period (1650—1699 AD).

Figure 3S: As in Fig. 1S, but the results are given for the recent calibration period (1950—1999 AD). The last row contains the pseudo-proxy results of the COBE2 reanalysis data.

630 Figure 4S: As in Fig. 3S, but the results are given for the industrial calibration period (1850—1999 AD).

Figure 5S: As in Fig. 3S, but the results are given for the pre-industrial calibration period (850—1849 AD).

635 Figure 6S: Correlation coefficient between the reconstructed and the original SST-anomaly evolution of the NA field during the industrial era, when the number of proxy locations used is NP=2 (1<sup>st</sup> and 3<sup>rd</sup> column) and NP=3 (2<sup>nd</sup> and 4<sup>th</sup> column). The results are given for the recent calibration period (1950—1999 AD) and for the two different reconstruction methods (1<sup>st</sup> and 2<sup>nd</sup> column CCA, 3<sup>rd</sup> and 4<sup>th</sup> column PCA) for the model CCSM4 (1<sup>st</sup> row), three realizations of the MPI-ESM-P model (2<sup>nd</sup>, 3<sup>rd</sup> and 4<sup>th</sup> row) and the COBE2 reanalysis data (5<sup>th</sup> row).

Figure 7S: As in Fig. 5S, but the results are given for the noise contaminated pseudo-proxy experiment.

640 Figure 8S: SD ratio between the reconstructed and the original SST-anomaly evolution of the NA field during the industrial period, for the ideal (column 1 and 2) and the noise contaminated (column 2 and 4) pseudo-proxy experiment. The results are given for the recent calibration and for the two different reconstruction methods (1<sup>st</sup> and 2<sup>n</sup> column CCA, 3<sup>rd</sup> and 4<sup>th</sup> column PCA) for the models CCSM4 (1<sup>st</sup> row) and three realizations of the MPI-ESM-P model (2<sup>nd</sup>, 3<sup>rd</sup> and 4<sup>th</sup> row), as well as the COBE2 data (5<sup>th</sup> row).

645 Figure 9S: As in Fig. 8S, but for the LIA calibration period and for the model CCSM4 (1<sup>st</sup> row) and three realizations of the MPI-ESM-P model (2<sup>nd</sup>, 3<sup>rd</sup> and 4<sup>th</sup> row).

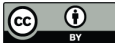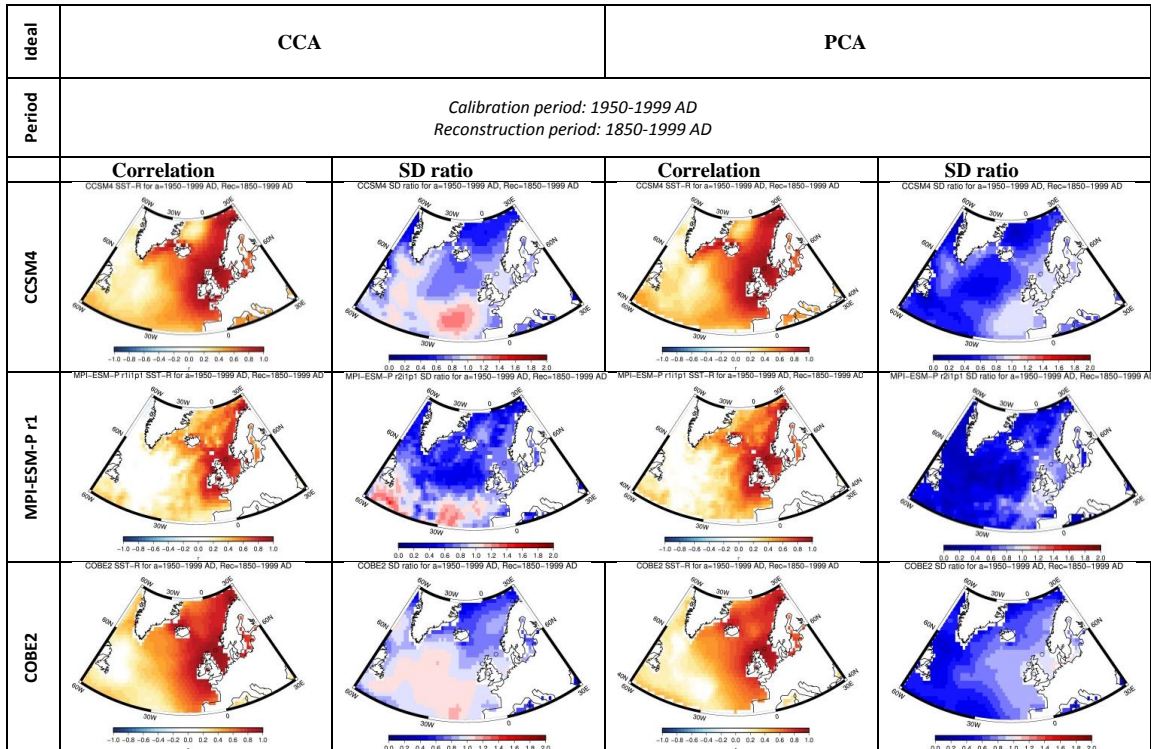

650 **Figure 1:** Correlation coefficient (columns 1 and 4) and SD ratio (columns 2 and 4) between the reconstructed and the original SST-anomaly evolution of the NA field during the industrial era. The results are given for the recent calibration period (1950—1999 AD) and for the two different reconstruction methods (1<sup>st</sup> and 2<sup>nd</sup> column CCA, 3<sup>rd</sup> and 4<sup>th</sup> column PCA) for the models CCSM4 (first row) and MPI-ESM-P r1 (second row) and the reanalysis data COBE2 (third row).

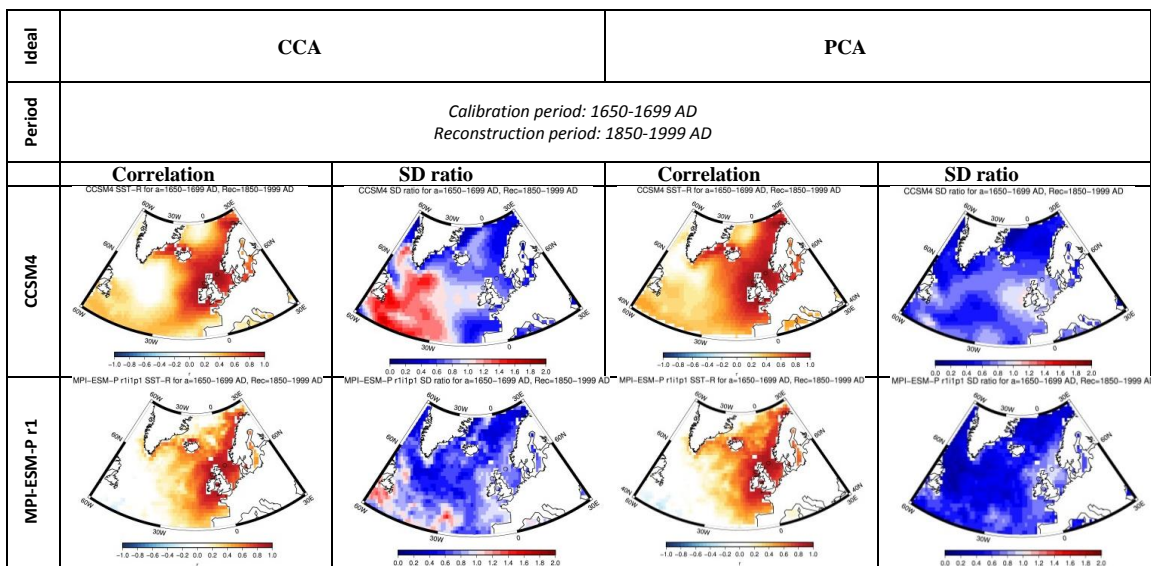

655 **Figure 2:** Correlation coefficient between the reconstructed and the original SST-anomaly evolution of the NA field during the industrial era. The results are given for the LIA calibration period (1650—1699 AD) and for the two different reconstruction methods (1<sup>st</sup> and 2<sup>nd</sup> column CCA, 3<sup>rd</sup> and 4<sup>th</sup> column PCA) for the models CCSM4 (first row) and MPI-ESM-P r1 (second row).

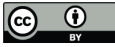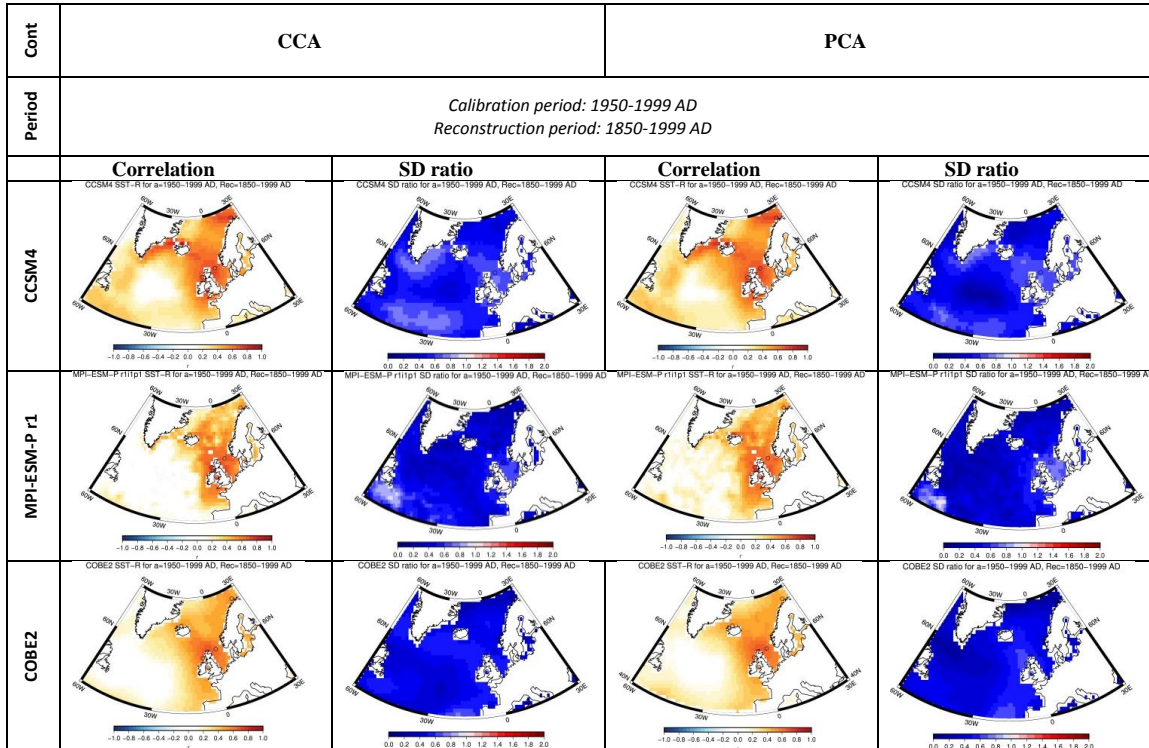

Figure 3: Same as in Fig. 1, but for the noise-contaminated pseudo-proxies.

660

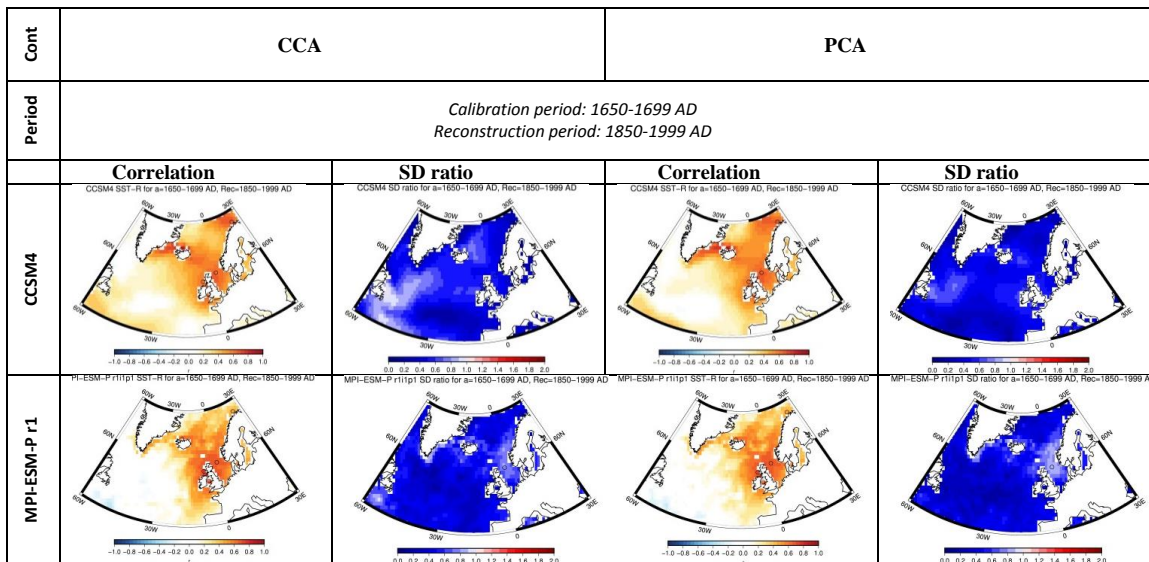

Figure 4: Same as in Fig. 2, but for the noise-contaminated pseudo-proxies.



665

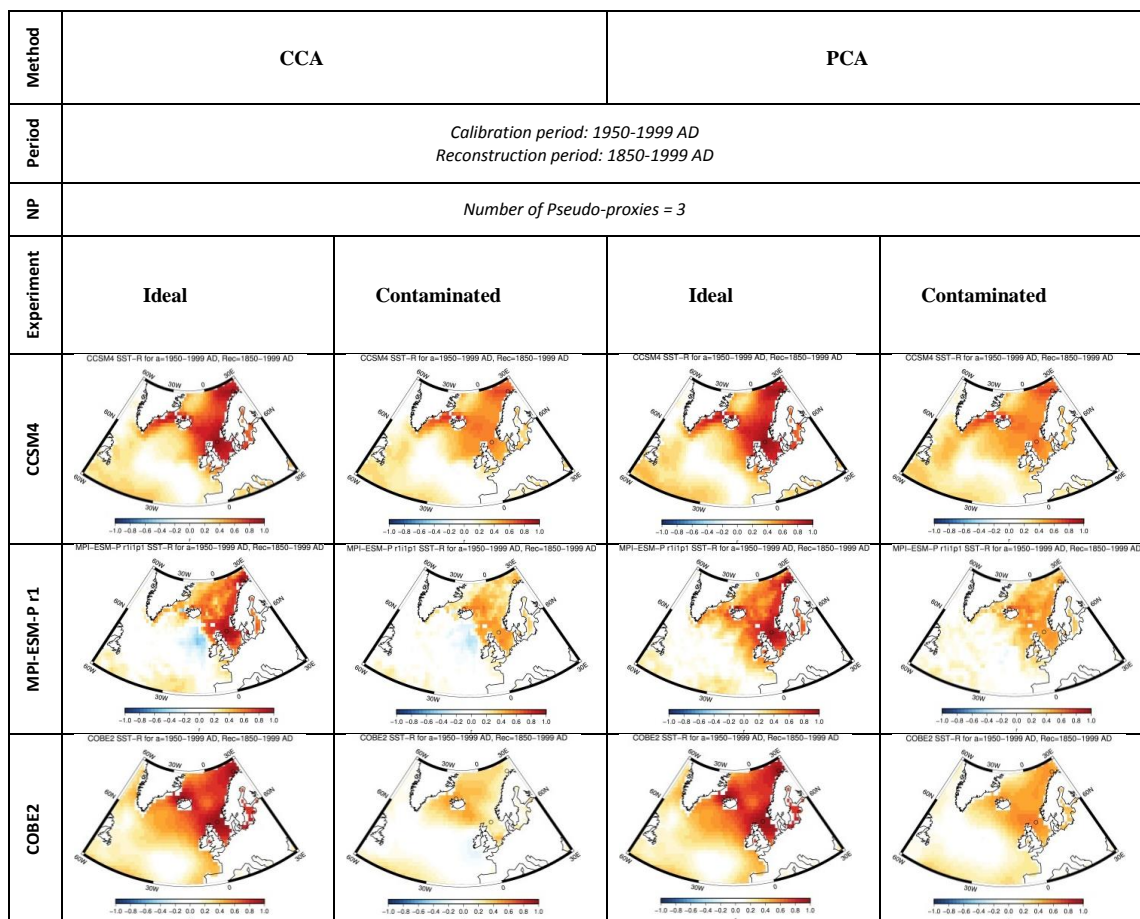

670 **Figure 5:** Correlation coefficient between the reconstructed and the original SST-anomaly evolution of the NA field during the industrial era for the ideal (columns 1 and 3) and the noise contaminated experiment (columns 2 and 4) when the number of proxy locations used is NP=3. The results are given for the recent calibration period (1950–1999 AD), for two different reconstruction methods (1<sup>st</sup> and 2<sup>nd</sup> column CCA, 3<sup>rd</sup> and 4<sup>th</sup> column PCA) and for the models CCSM4 (first row) and MPI-ESM-P r1 (second row), and the reanalysis data COBE2 (third row).

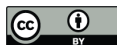

APPENDIX

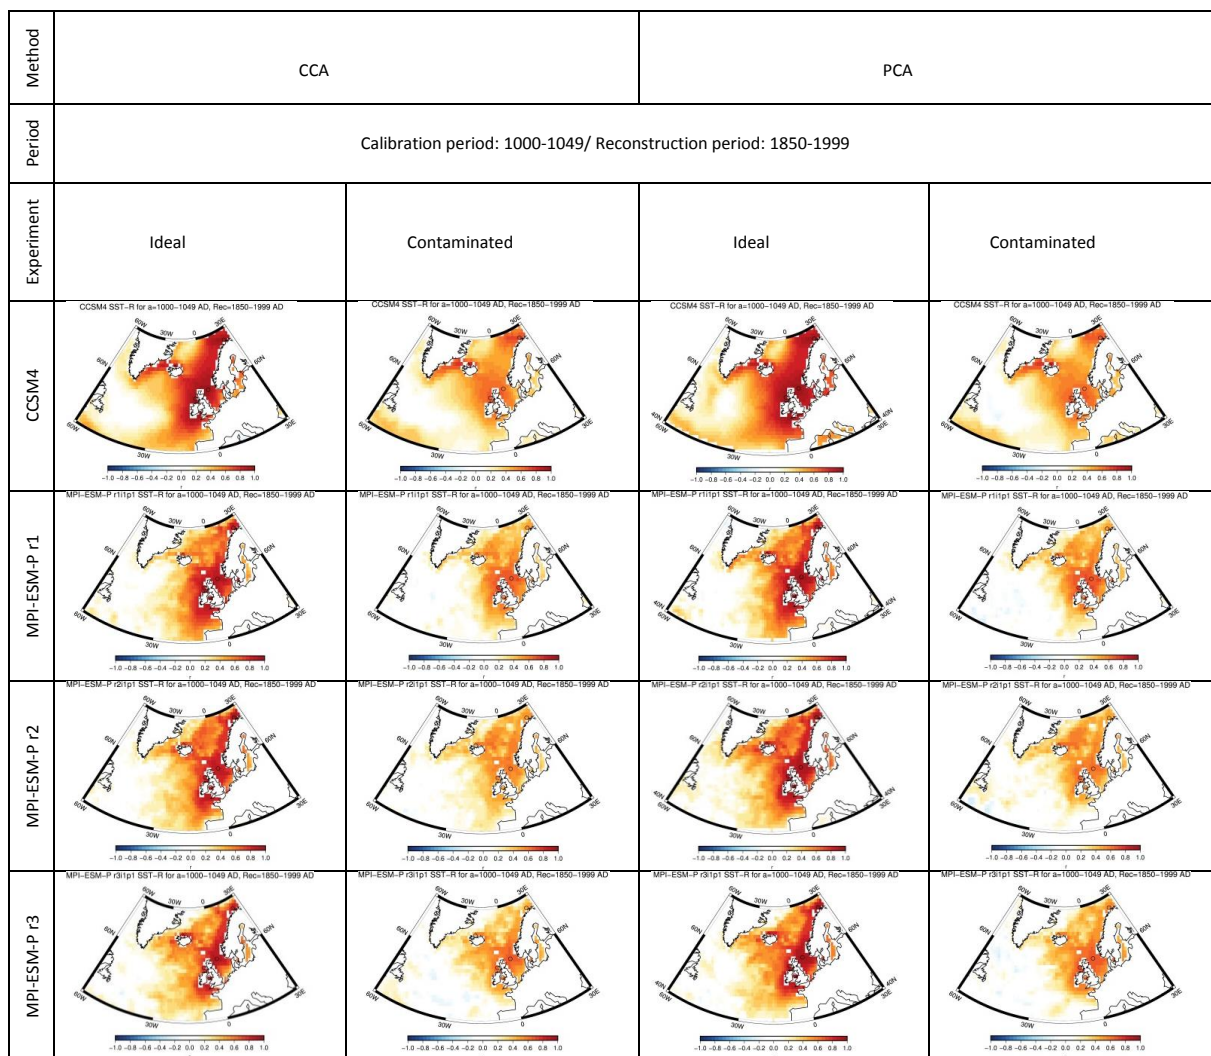

675

Figure 1S: Correlation coefficient between the reconstructed and the original SST-anomaly evolution of the NA field for the ideal (column 1 and 3) and the noise contaminated experiment (column 2 and 4). The results are given for the MCA calibration period (1000—1049 AD) and for the two different reconstruction methods (1<sup>st</sup> and 2<sup>nd</sup> column CCA, 3<sup>rd</sup> and 4<sup>th</sup> column PCA) for the models CCSM4 (1<sup>st</sup> row) and three realizations of the MPI-ESM-P model (2<sup>nd</sup>, 3<sup>rd</sup> and 4<sup>th</sup> row).

680

685

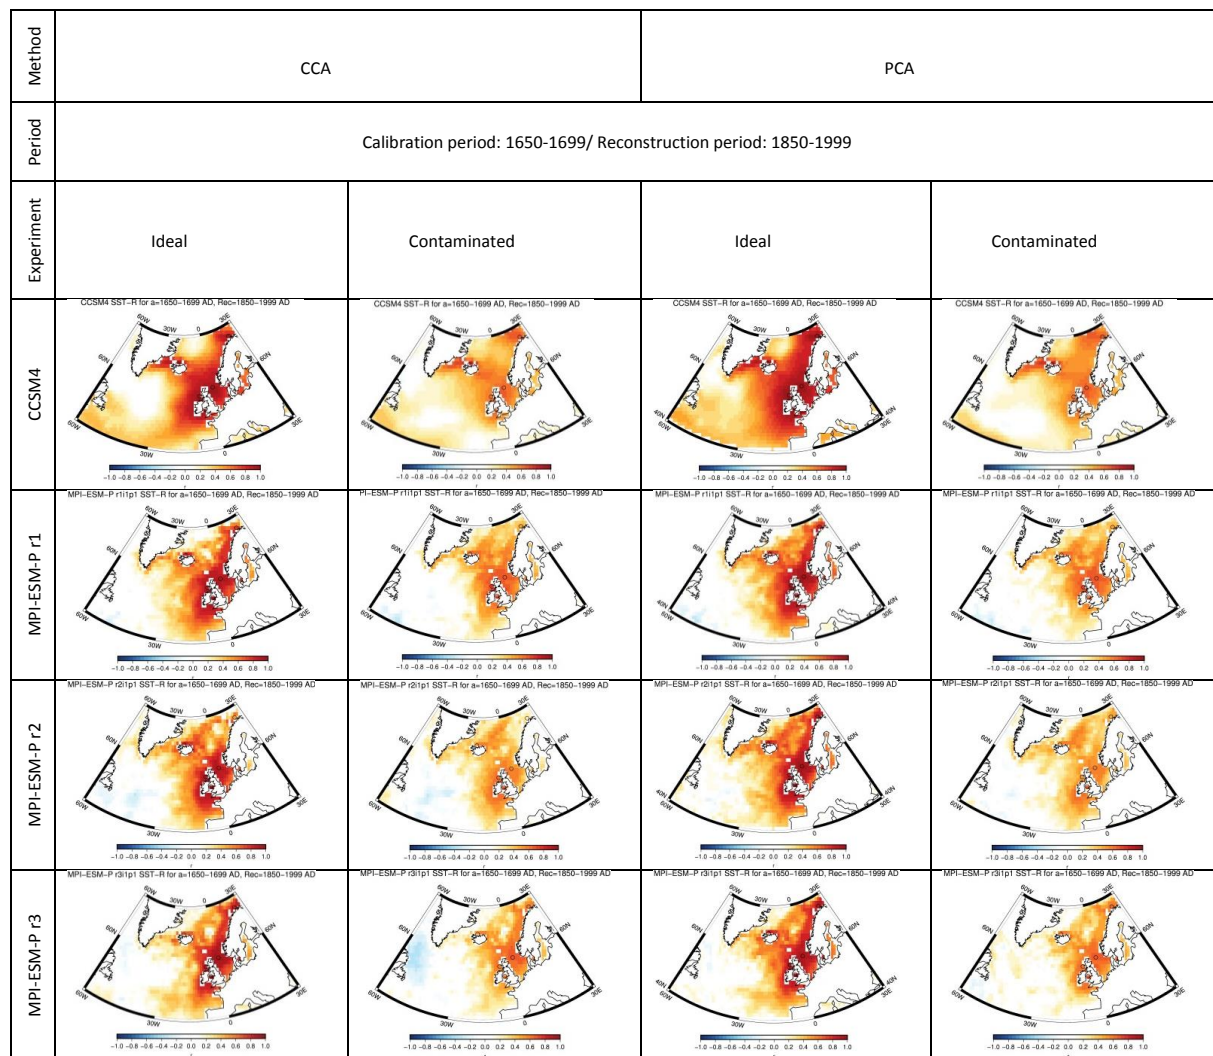

Figure 2S: As in Fig. 1S, but the results are given for the LIA calibration period (1650—1699 AD).

690

695

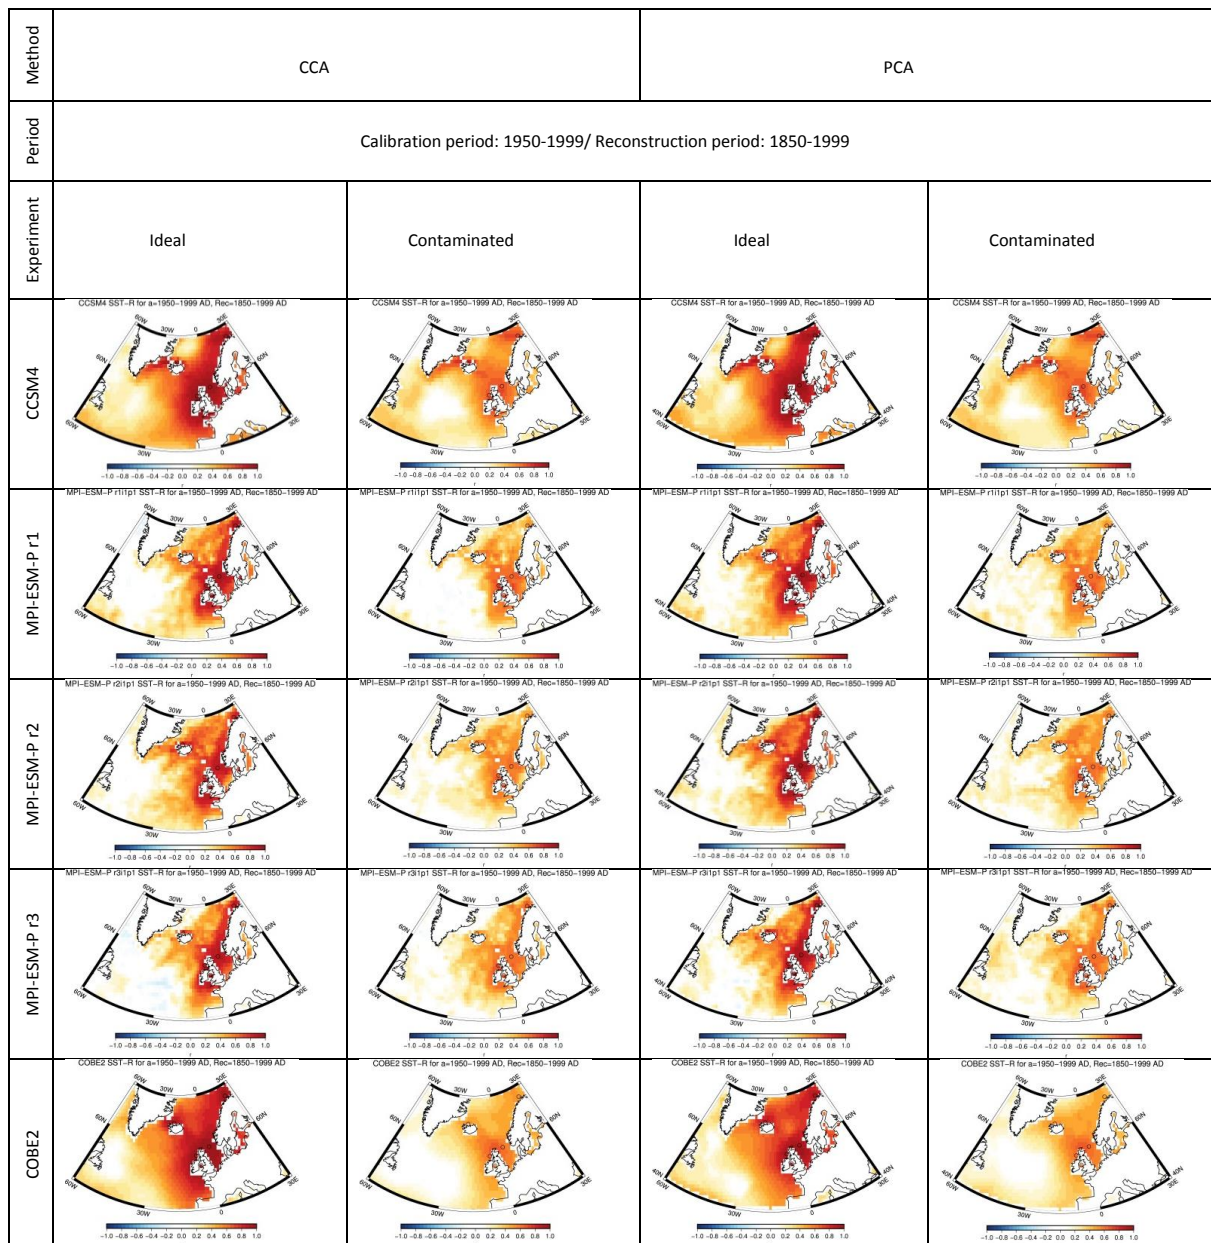

700

Figure 3S: As in Fig. 1S, but the results are given for the recent calibration period (1950—1999 AD). The last row contains the pseudo-proxy results of the COBE2 reanalysis data.

705

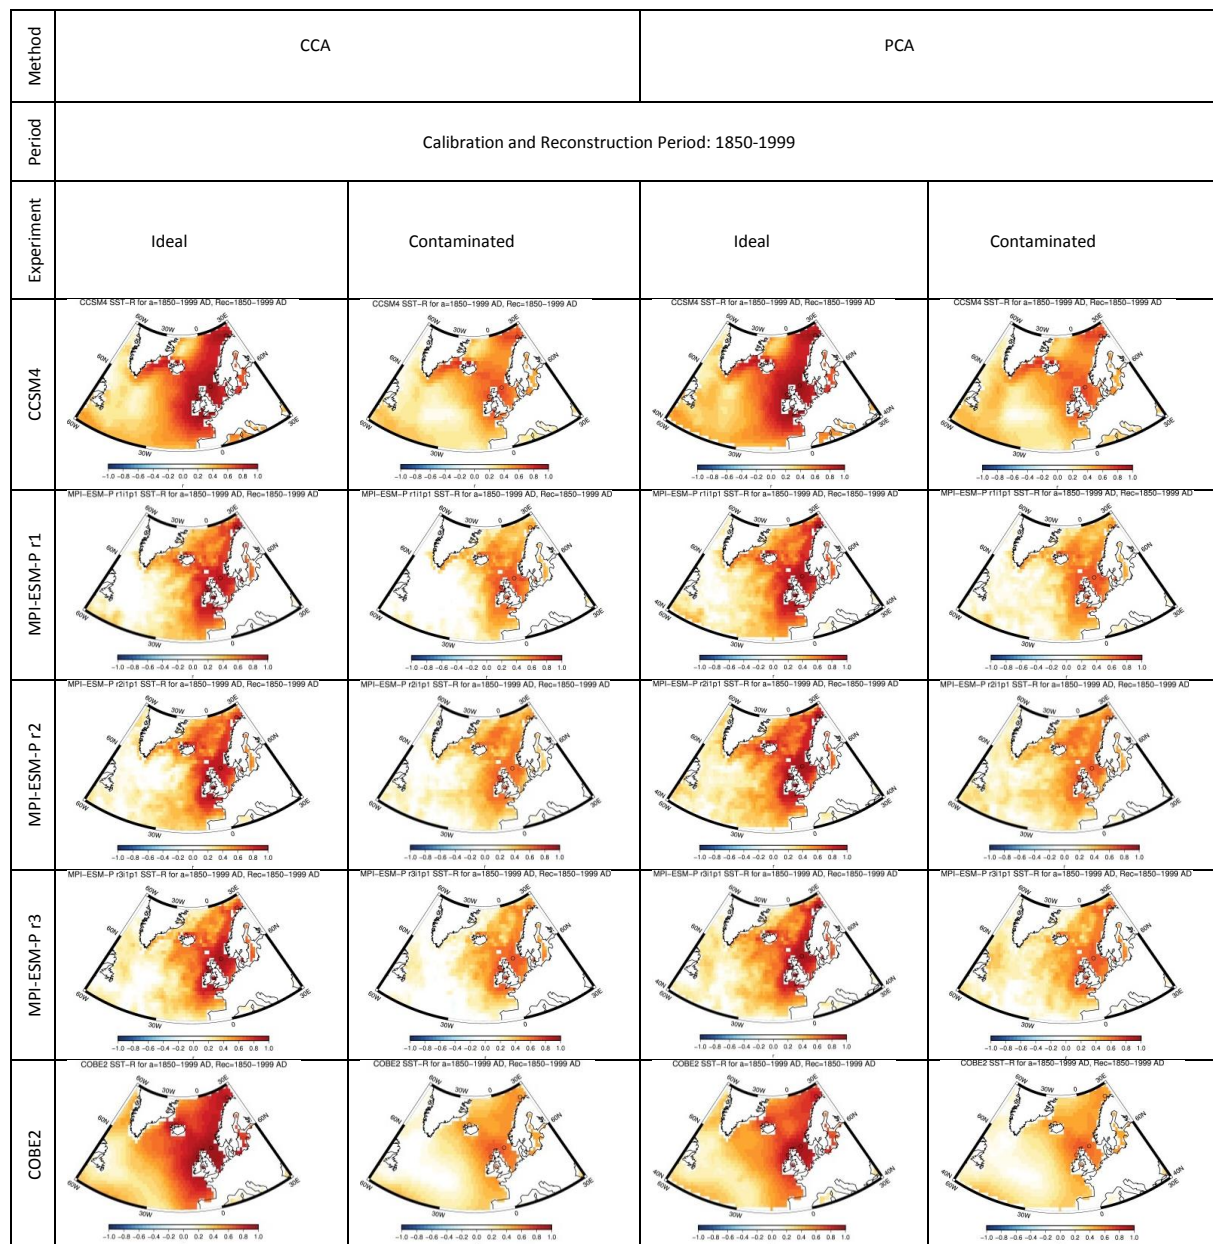

Figure 4S: As in Fig. 3S, but the results are given for the industrial calibration period (1850—1999 AD).



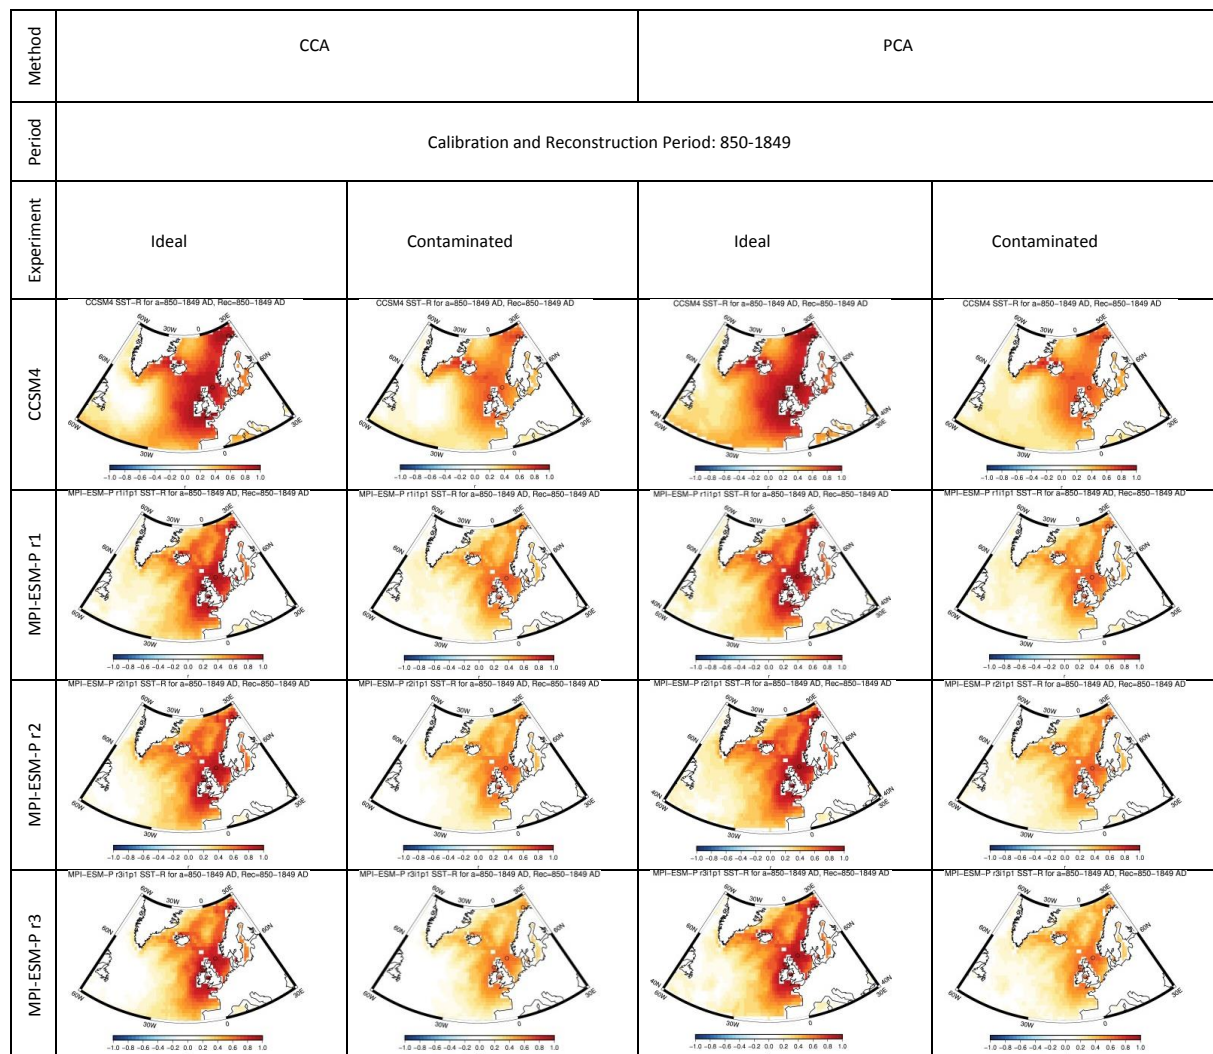

715

Figure 5S: As in Fig. 3S, but the results are given for the pre-industrial calibration period (850—1849 AD).

720

725

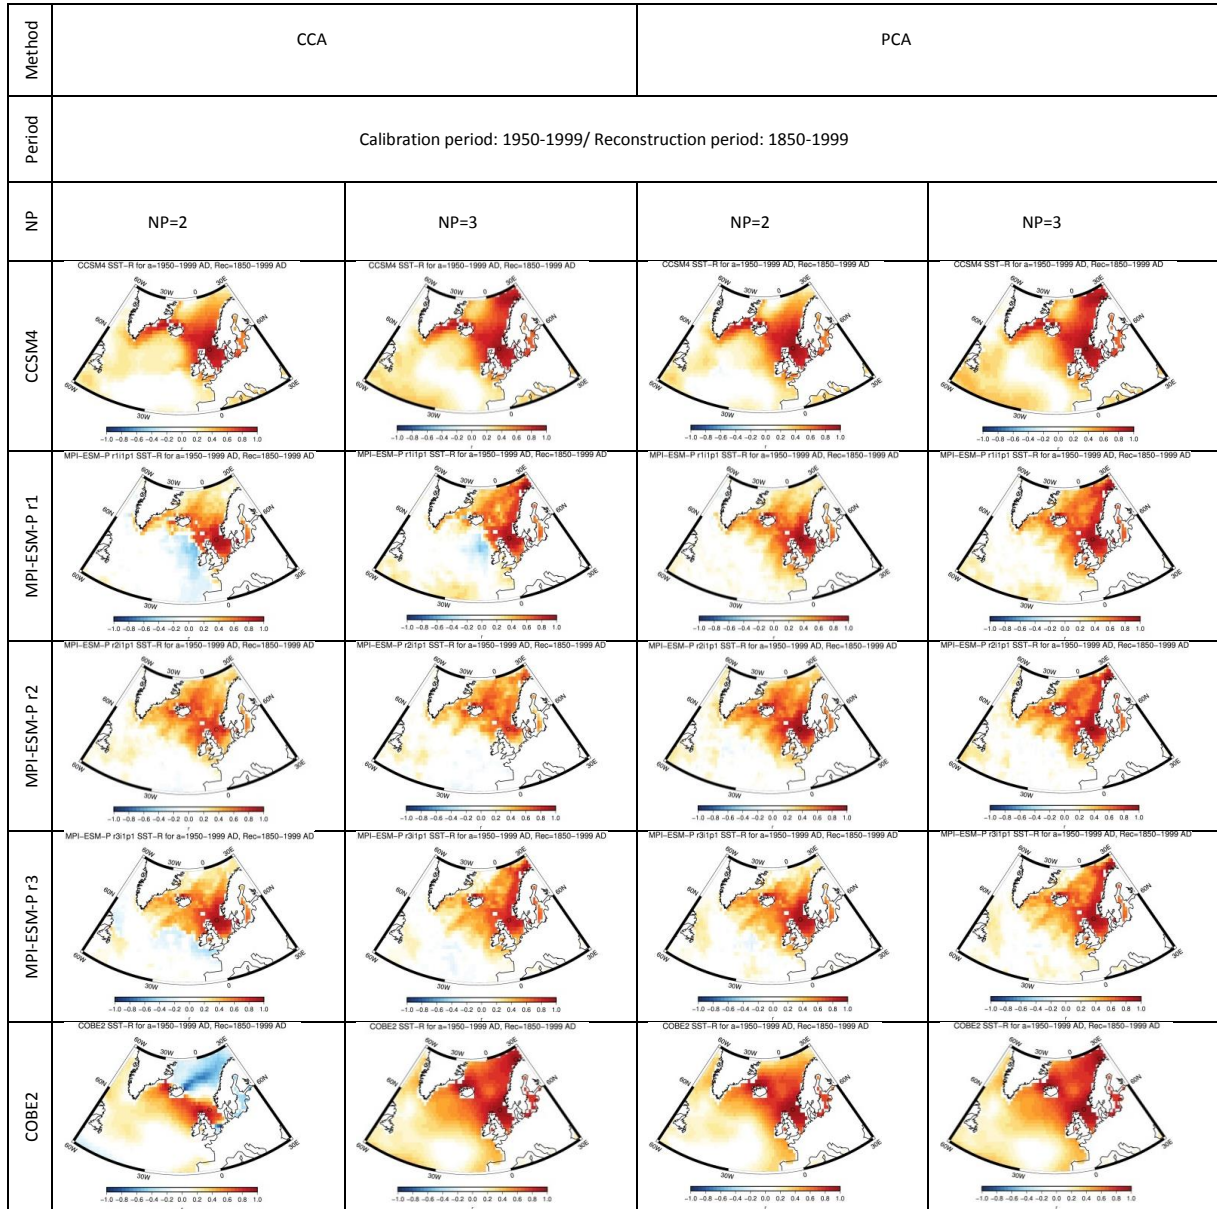

730

Figure 6S: Correlation coefficient between the reconstructed and the original SST-anomaly evolution of the NA field during the industrial era, when the number of proxy locations used is NP=2 (1st and 3rd column) and NP=3 (2<sup>nd</sup> and 4<sup>th</sup> column). The results are given for the recent calibration period (1950—1999 AD) and for the two different reconstruction methods (1<sup>st</sup> and 2<sup>nd</sup> column CCA, 3<sup>rd</sup> and 4<sup>th</sup> column PCA) for the model CCSM4 (1<sup>st</sup> row), three realizations of the MPI-ESM-P model (2<sup>nd</sup>, 3<sup>rd</sup> and 4<sup>th</sup> row) and COBE2 reanalysis data (5<sup>th</sup> row).

735

740

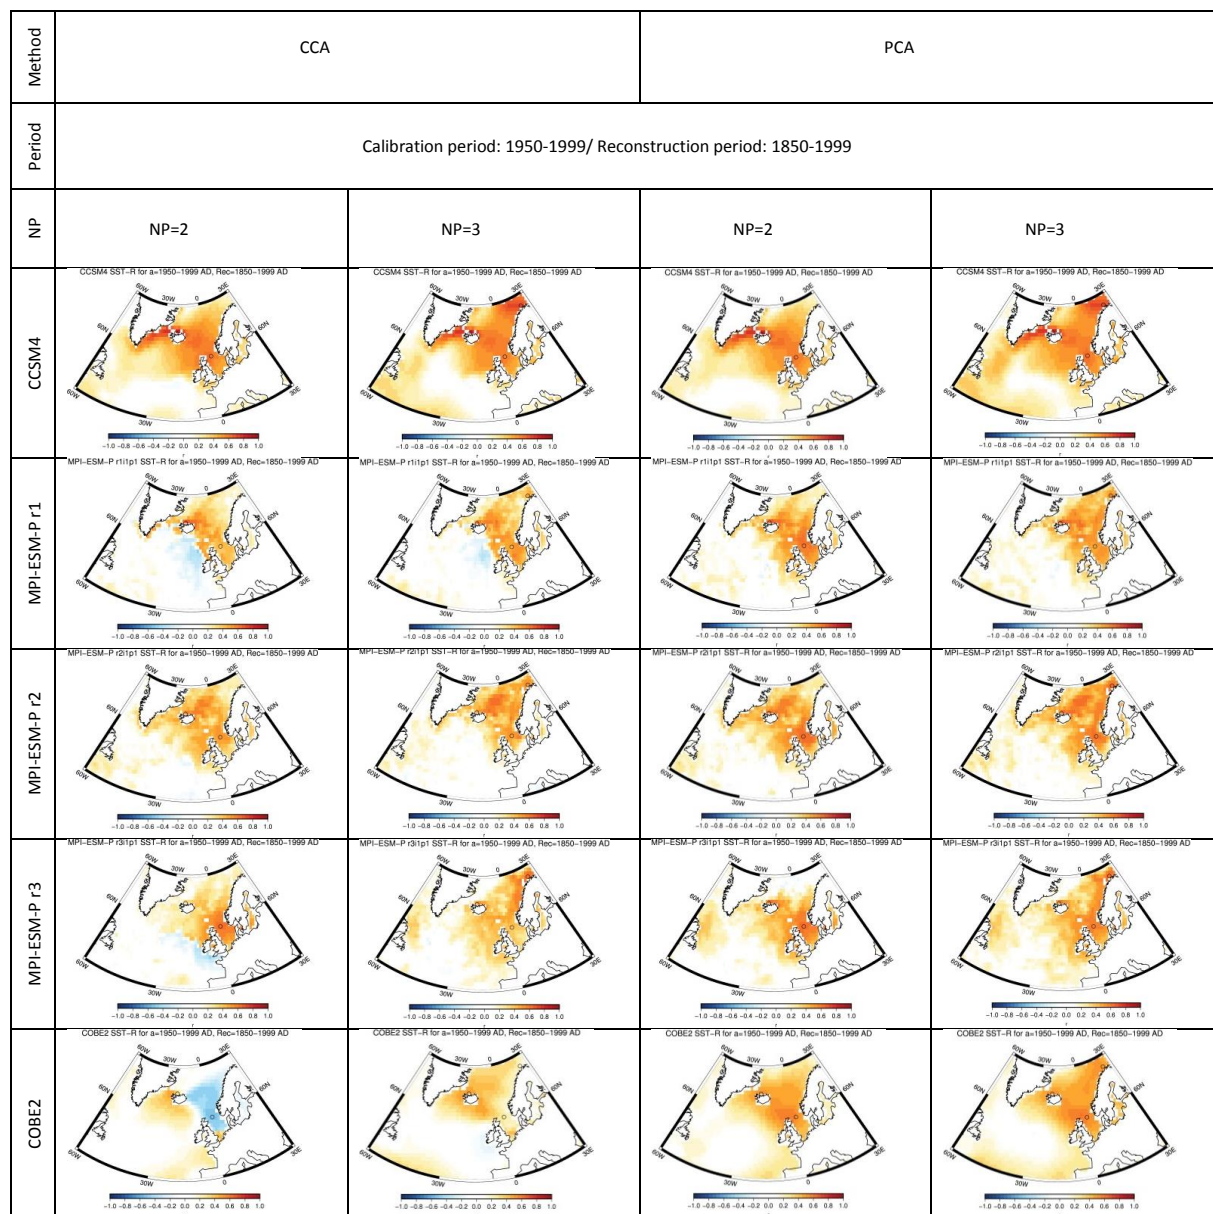

745

Figure 7S: As in Fig. 5S, but the results are given for the noise contaminated pseudo-proxy experiment.

750

755

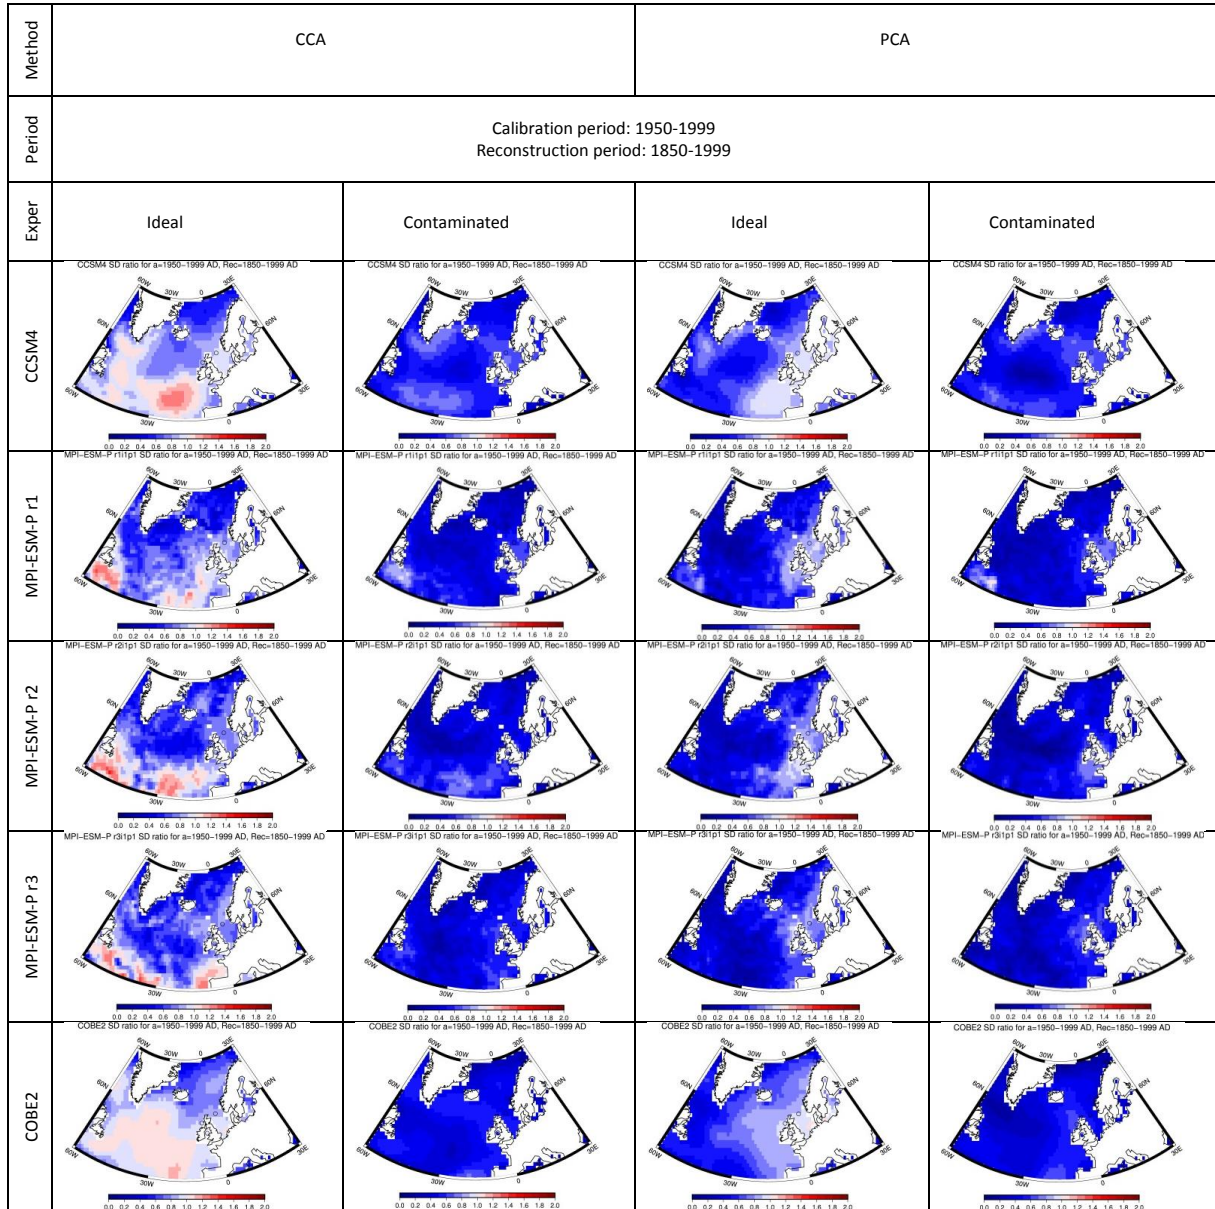

Figure 8S: SD ratio between the reconstructed and the original SST-anomaly evolution of the NA field during the industrial period, for the ideal (column 1 and 2) and the noise contaminated (column 3 and 4) pseudo-proxy experiment. The results are given for the recent calibration and for the two different reconstruction methods (1<sup>st</sup> and 2<sup>nd</sup> column CCA, 3<sup>rd</sup> and 4<sup>th</sup> column PCA) for the models CCSM4 (1<sup>st</sup> row) and three realizations of the MPI-ESM-P model (2<sup>nd</sup>, 3<sup>rd</sup> and 4<sup>th</sup> row), as well as the COBE2 data (5<sup>th</sup> row).

760

765

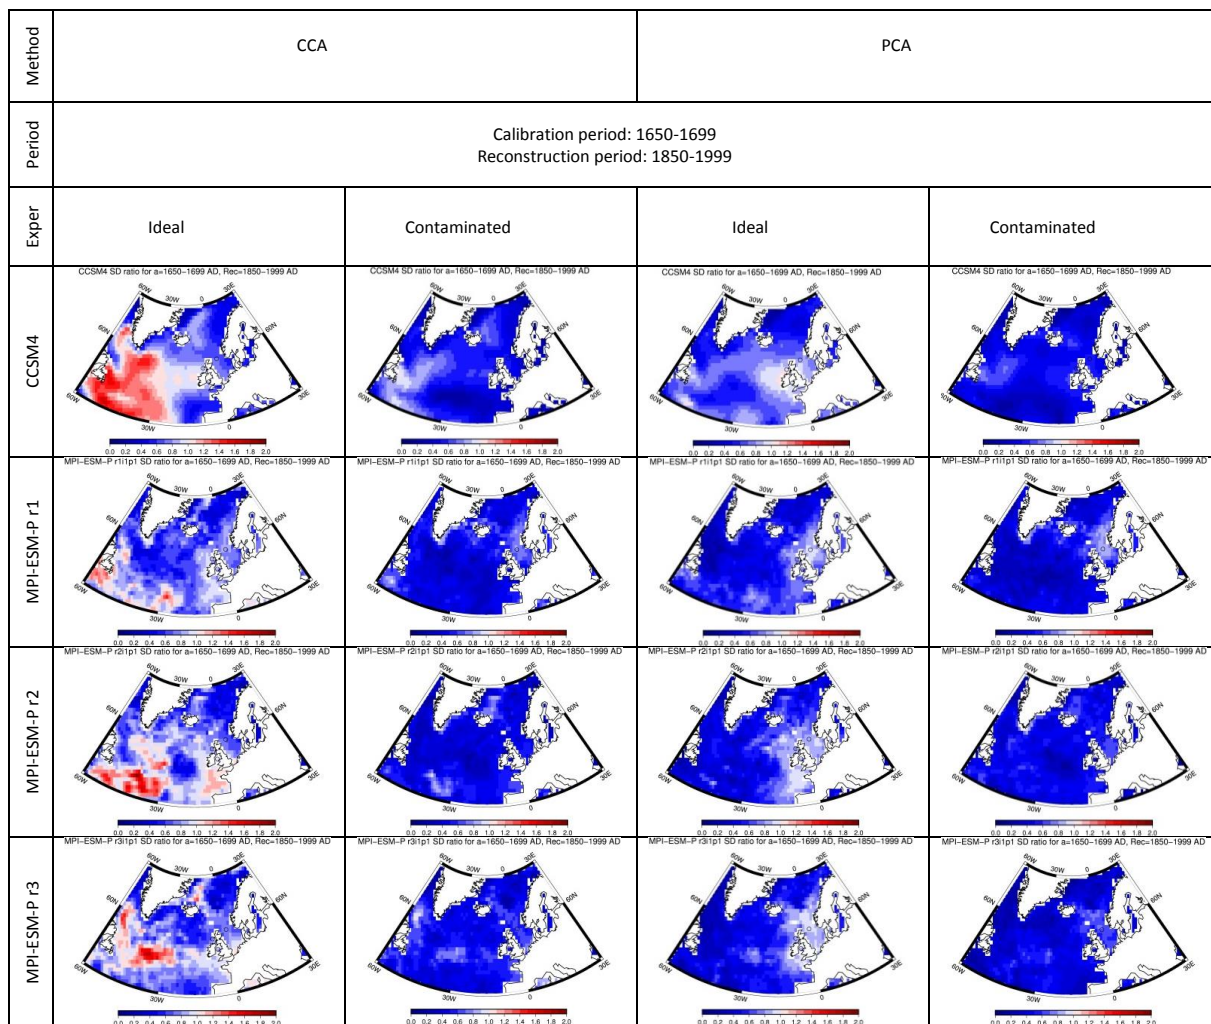

770 **Figure 9S:** As in Fig. 8S, but for the LIA calibration period and for the model CCSM4 (1<sup>st</sup> row) and three realizations of the MPI-ESM-P model (2<sup>nd</sup>, 3<sup>rd</sup> and 4<sup>th</sup> row).
